# Supplementary material for: P-Heterocyclic carbenes as potential ligands in the design of new metathesis catalysts. A computational study
Source: Royal Society of Chemistry journal article supplement (doi:10.1039/b516680b), 2006-01-01
Supplement: b516680b.pdf [file b516680b.pdf]

P-heterocyclic carbenes as potential ligands for the  
design of new metathesis catalysts

Heiko Jacobsen

Supplementary Material

**p1**

Atom Coordinates (x,y,z) in Angstrom

```

-----
Ru  0.262769  -0.015109  0.134448
Cl  0.281856  2.323020  -0.123579
Cl  0.329197  -2.078008  -0.986830
C   -1.705067  0.009047  0.095013
C   0.333899  -0.375181  1.930734
P   2.724645  -0.004247  -0.062946
H   -0.574668  -0.420695  2.572129
H   1.291160  -0.555853  2.468893
C   3.620928  -1.557684  0.390212
C   3.614419  1.307739  0.890239
C   3.262452  0.302416  -1.805078
P   -2.743601  -1.394426  0.448792
C   -4.399154  -0.643110  0.329839
C   -4.395366  0.565169  -0.297170
P   -2.763168  1.383896  -0.358570
H   -2.502084  -1.756181  1.817451
H   -5.316608  1.095109  -0.594478
H   -2.538355  1.724916  -1.730610
H   -5.317039  -1.207588  0.565576
H   4.702640  1.315059  0.672828
H   3.167158  2.287481  0.628388
H   3.460940  1.142286  1.976046
H   4.367903  0.327591  -1.898154
H   2.853150  -0.501822  -2.448876
H   2.839800  1.270734  -2.140929
H   4.710338  -1.483326  0.192642
H   3.460812  -1.777066  1.465613
H   3.184307  -2.389800  -0.197125
-----

```

```

Energy E (RB-P86)  -2314.67909472 a.u.
                   -6077189.96 kJ/mol
                   -1452483.12 kcal/mol

```

SCF Convergence: 0.9828D-08

Maximum Force: 0.000013

&lt;S\*\*2&gt;: 0.0000

Charge: 0.0000

ZPE-correction: 0.192425 a.u.

Lowest Frequency 33.0752 cm<sup>-1</sup>**p2**

Atom Coordinates (x,y,z) in Angstrom

```

-----
Ru  1.079293  0.062239  0.111911
Cl  1.305496  1.964889  1.363239
Cl  1.664996  -0.663015  -1.984892
C   -0.755590  -0.158021  0.014730
C   1.429914  -1.339275  1.214067
H   0.672964  -2.090068  1.537019
H   2.473863  -1.483871  1.579808
P   -1.815616  -1.006695  1.259267
C   -3.403948  -0.629126  0.421224
C   -3.341571  -0.098017  -0.824680
P   -1.719635  0.559566  -1.376753
H   -1.775947  -0.013588  2.301950
H   -4.243325  0.074793  -1.437729
H   -1.302743  -0.357434  -2.408018
H   -4.356142  -0.946640  0.881216
-----

```

```

Energy E (RB-P86)  -1853.71724796 a.u.
                   -4866934.63 kJ/mol

```

-1163225.18 kcal/mol  
 SCF Convergence: 0.8784D-08  
 Maximum Force: 0.000014  
 <S\*\*2>: 0.0000  
 Charge: 0.0000  
 ZPE-correction: 0.081604 a.u.  
 Lowest Frequency 44.7695 cm-1

**p3**

Atom Coordinates (x,y,z) in Angstrom

|    |           |           |           |
|----|-----------|-----------|-----------|
| Ru | -0.888370 | -0.053004 | 0.107674  |
| Cl | -0.722169 | -2.343277 | -0.420233 |
| Cl | -0.967960 | 2.196391  | -0.564453 |
| C  | 1.050803  | 0.023926  | 0.049786  |
| C  | -0.876300 | -0.038711 | 1.946073  |
| H  | 0.058862  | -0.071145 | 2.545731  |
| H  | -1.816843 | -0.017825 | 2.534057  |
| C  | -3.333712 | 0.269300  | 0.395264  |
| C  | -3.109625 | -0.352601 | -0.806409 |
| H  | -3.387562 | 1.365309  | 0.480147  |
| H  | -3.621207 | -0.322749 | 1.279794  |
| H  | -3.217053 | -1.441741 | -0.919313 |
| H  | -2.985912 | 0.234107  | -1.733230 |
| P  | 2.036333  | 1.417267  | 0.559644  |
| C  | 3.710627  | 0.750317  | 0.318945  |
| C  | 3.739023  | -0.364161 | -0.462853 |
| P  | 2.143722  | -1.239724 | -0.597076 |
| H  | 1.814533  | 1.612223  | 1.963846  |
| H  | 4.671481  | -0.811445 | -0.847338 |
| H  | 1.909018  | -1.428038 | -1.995669 |
| H  | 4.609448  | 1.318992  | 0.610616  |

Energy E(RB-P86) -1932.24785639 a.u.  
 -5073116.75 kJ/mol  
 -1212503.89 kcal/mol

SCF Convergence: 0.3457D-08  
 Maximum Force: 0.000043  
 <S\*\*2>: 0.0000  
 Charge: 0.0000  
 ZPE-correction: 0.134396 a.u.  
 Lowest Frequency 36.6639 cm-1

**p4**

Atom Coordinates (x,y,z) in Angstrom

|    |           |           |           |
|----|-----------|-----------|-----------|
| Ru | 0.246261  | -0.879225 | 0.089229  |
| C  | 2.041397  | -1.024373 | 0.387730  |
| C  | -0.039451 | 1.025907  | 0.043130  |
| Cl | -0.184967 | -0.875568 | 2.468338  |
| Cl | 0.876818  | -0.605605 | -2.279987 |
| H  | 2.397795  | -1.351200 | 1.387310  |
| H  | 2.777987  | -0.841491 | -0.420914 |
| C  | -0.933829 | -2.838669 | 0.385090  |
| C  | -0.642683 | -2.756296 | -0.967727 |
| H  | -0.312425 | -3.433037 | 1.073778  |
| H  | 0.222163  | -3.276684 | -1.407073 |
| H  | -1.366764 | -2.347556 | -1.690723 |
| H  | -1.904413 | -2.508385 | 0.789725  |
| P  | -1.723359 | 1.494397  | 0.486313  |
| P  | 0.937540  | 2.386448  | -0.565845 |
| C  | -1.573950 | 3.258064  | 0.004723  |
| C  | -0.432061 | 3.602366  | -0.646487 |
| H  | -1.601691 | 1.400202  | 1.921709  |

|   |           |          |           |
|---|-----------|----------|-----------|
| H | 1.156656  | 1.850311 | -1.892148 |
| H | -0.268497 | 4.611852 | -1.061762 |
| H | -2.426994 | 3.947182 | 0.126273  |

---

Energy E(RB-P86) -1932.23581914 a.u.  
-5073085.14 kJ/mol  
-1212496.33 kcal/mol

SCF Convergence: 0.8122D-08  
Maximum Force: 0.000009  
<S\*\*2>: 0.0000  
Charge: 0.0000  
ZPE-correction: 0.133590 a.u.  
Lowest Frequency 42.2770 cm-1

**(p4-p5)≠**

Atom Coordinates (x,y,z) in Angstrom

|    |           |           |           |
|----|-----------|-----------|-----------|
| Ru | 0.062726  | 0.859355  | 0.037894  |
| Cl | -0.339578 | 1.059494  | -2.290841 |
| Cl | 0.041512  | 0.675046  | 2.416232  |
| P  | 0.538659  | -2.125035 | -1.392289 |
| P  | -0.771471 | -2.086043 | 1.187318  |
| C  | -0.006142 | -1.076616 | -0.058527 |
| C  | 0.132208  | -3.758602 | -0.701384 |
| C  | -0.718378 | -3.708104 | 0.363228  |
| C  | -0.984303 | 2.889032  | 0.380765  |
| C  | 0.293382  | 3.319219  | 0.050126  |
| C  | 1.853743  | 1.234526  | -0.145325 |
| H  | 1.969725  | -2.045769 | -1.474902 |
| H  | -2.151655 | -1.743995 | 1.365977  |
| H  | 0.407441  | -4.692493 | -1.219853 |
| H  | -1.189636 | -4.600017 | 0.809660  |
| H  | -1.758944 | 2.834139  | -0.402987 |
| H  | -1.308677 | 2.858924  | 1.432876  |
| H  | 0.553208  | 3.559924  | -0.992714 |
| H  | 1.003984  | 3.619811  | 0.837048  |
| H  | 2.263468  | 1.714403  | -1.062533 |
| H  | 2.587374  | 0.965706  | 0.649715  |

---

Energy E(RB-P86) -1932.23570939 a.u.  
-5073084.86 kJ/mol  
-1212496.26 kcal/mol

SCF Convergence: 0.3844D-08  
Maximum Force: 0.000013  
<S\*\*2>: 0.0000  
Charge: 0.0000  
ZPE-correction: 0.133549 a.u.  
Lowest Frequency -251.4749 cm-1

**p5**

Atom Coordinates (x,y,z) in Angstrom

|    |           |           |           |
|----|-----------|-----------|-----------|
| Ru | 0.838036  | 0.026789  | 0.035087  |
| Cl | 0.693343  | 2.346081  | 0.542070  |
| Cl | 0.885959  | -2.295357 | -0.475823 |
| C  | -1.078734 | -0.034767 | -0.044630 |
| C  | 2.259871  | -0.338377 | 1.385028  |
| C  | 3.132201  | 0.100325  | 0.131348  |
| C  | 2.341777  | 0.487789  | -1.191395 |
| H  | 2.287133  | 0.389346  | 2.217202  |
| H  | 2.409336  | -1.393042 | 1.679925  |
| H  | 3.700145  | 1.000830  | 0.433342  |
| H  | 3.777516  | -0.762845 | -0.119917 |
| H  | 2.484721  | -0.233492 | -2.017325 |

|   |           |           |           |
|---|-----------|-----------|-----------|
| H | 2.447577  | 1.550965  | -1.474321 |
| P | -2.068550 | -1.467765 | 0.295195  |
| C | -3.723594 | -0.726575 | 0.156085  |
| C | -3.735923 | 0.486875  | -0.470299 |
| P | -2.125958 | 1.332785  | -0.470930 |
| H | -1.908978 | -1.890195 | 1.655969  |
| H | -4.660234 | 1.002457  | -0.781263 |
| H | -1.878971 | 1.768918  | -1.814162 |
| H | -4.635929 | -1.300882 | 0.389714  |

-----  
 Energy E(RB-P86) -1932.26109596 a.u.  
                   -5073151.51 kJ/mol  
                   -1212512.19 kcal/mol

SCF Convergence: 0.3435D-08

Maximum Force: 0.000030

<S\*\*2>: 0.0000

Charge: 0.0000

ZPE-correction: 0.137527 a.u.

Lowest Frequency 40.9728 cm-1

---

**(p1-p6)#**

Atom Coordinates (x,y,z) in Angstrom

-----  

|    |           |           |           |
|----|-----------|-----------|-----------|
| Ru | 0.175196  | -0.014263 | -0.216258 |
| Cl | 0.027750  | -2.306063 | -0.650681 |
| Cl | 0.470128  | 0.337035  | 2.196149  |
| C  | -1.767370 | 0.050268  | -0.106920 |
| C  | 0.255256  | 0.626907  | -1.954328 |
| P  | 2.687808  | -0.398802 | -0.099996 |
| H  | 1.207341  | 0.840211  | -2.488426 |
| H  | -0.651907 | 0.921868  | -2.531307 |
| C  | 3.903215  | 0.837170  | 0.565084  |
| C  | 3.473840  | -0.888310 | -1.708055 |
| C  | 3.045512  | -1.855775 | 0.979664  |
| P  | -2.824683 | 1.505462  | -0.284527 |
| C  | -4.463514 | 0.720604  | -0.082046 |
| C  | -4.417130 | -0.541604 | 0.419170  |
| P  | -2.800660 | -1.378940 | 0.256444  |
| H  | -2.690409 | 1.801418  | -1.689455 |
| H  | -5.318502 | -1.096059 | 0.733482  |
| H  | -2.433947 | -1.814828 | 1.570816  |
| C  | 1.301220  | 2.866351  | 0.046329  |
| C  | -0.002998 | 3.208838  | 0.134283  |
| H  | -0.554152 | 3.620943  | -0.727525 |
| H  | -0.554885 | 3.109812  | 1.082043  |
| H  | 1.840433  | 2.497987  | 0.929339  |
| H  | 1.870516  | 2.993328  | -0.889550 |
| H  | -5.395346 | 1.302901  | -0.182704 |
| H  | 4.913428  | 0.383570  | 0.638478  |
| H  | 3.959292  | 1.729821  | -0.088058 |
| H  | 3.574030  | 1.150513  | 1.575983  |
| H  | 4.127611  | -2.100110 | 0.986100  |
| H  | 2.701440  | -1.611058 | 2.004135  |
| H  | 2.457551  | -2.719898 | 0.613741  |
| H  | 4.530439  | -1.197561 | -1.569387 |
| H  | 2.897477  | -1.731944 | -2.138320 |
| H  | 3.441866  | -0.042358 | -2.424895 |

-----  
 Energy E(RB-P86) -2393.17829753 a.u.  
                   -6283289.62 kJ/mol  
                   -1501742.12 kcal/mol

SCF Convergence: 0.9861D-08

Maximum Force: 0.000004

<S\*\*2>: 0.0000  
 Charge: 0.0000  
 ZPE-correction: 0.243270 a.u.  
 Lowest Frequency -122.8563 cm-1

**p6**

Atom Coordinates (x,y,z) in Angstrom

```
-----
Ru -0.375582 -0.253590 -0.314471
Cl  1.899638 -1.131612  0.000404
Cl  0.202298  2.270780 -0.200146
C   -0.306982 -0.102491  1.705885
C   -0.872136 -2.026692 -0.561365
P    0.525543  0.098791 -2.576343
H   -0.135390 -2.863130 -0.562196
H   -1.918846 -2.358531 -0.778233
C   -0.441354  1.127906 -3.768117
C    0.810623 -1.476246 -3.500676
C    2.170699  0.920205 -2.600957
P   -0.562725 -1.459808  2.832926
C    0.023584 -0.705684  4.388769
C    0.184019  0.641295  4.302920
P    0.291936  1.295503  2.596678
H    0.416453 -2.418835  2.414791
H    0.415067  1.280997  5.171995
C   -2.493801  0.263059  0.154374
C   -2.267248  0.434058 -1.225824
H   -2.130064  1.453460 -1.619026
H   -2.650605 -0.318992 -1.937050
H   -3.020985 -0.625351  0.540053
H   -2.513888  1.146415  0.812289
H   -0.569881  2.423857  2.493365
H    0.070729 -1.275560  5.331707
H    1.311676 -1.288081 -4.472560
H    1.451589 -2.124503 -2.870517
H   -0.156889 -1.987879 -3.675383
H    2.514599  1.038815 -3.649026
H    2.064741  1.902720 -2.101623
H    2.878387  0.302542 -2.016896
H    0.120128  1.233025 -4.719049
H   -1.427613  0.670531 -3.977546
H   -0.592231  2.130821 -3.321694
-----
```

Energy E(RB-P86) -2393.21457227 a.u.  
 -6283384.86 kJ/mol  
 -1501764.88 kcal/mol

SCF Convergence: 0.6185D-08

Maximum Force: 0.000010

<S\*\*2>: 0.0000  
 Charge: 0.0000  
 ZPE-correction: 0.246681 a.u.  
 Lowest Frequency 37.8911 cm-1

**(p6-p7)≠**

Atom Coordinates (x,y,z) in Angstrom

```
-----
Ru -0.343684 -0.211305 -0.274759
Cl  1.952491 -1.044946 -0.032039
Cl  0.614167  2.193037 -0.139059
C   -0.355476 -0.047057  1.708630
C   -0.752141 -2.020006 -0.592301
P    0.433110  0.001960 -2.642989
H    0.072274 -2.766492 -0.611330
H   -1.743284 -2.452172 -0.858661
-----
```

|   |           |           |           |
|---|-----------|-----------|-----------|
| C | -0.649349 | 0.866920  | -3.873810 |
| C | 0.758819  | -1.622033 | -3.466702 |
| C | 2.038260  | 0.879824  | -2.827468 |
| P | -0.774521 | -1.392439 | 2.817271  |
| C | -0.220170 | -0.674734 | 4.405353  |
| C | 0.053865  | 0.653669  | 4.330736  |
| P | 0.324980  | 1.297119  | 2.635991  |
| H | 0.193964  | -2.387524 | 2.455221  |
| H | 0.286201  | 1.273394  | 5.214273  |
| C | -2.589261 | -0.106816 | -0.127433 |
| C | -2.135017 | 1.029779  | -0.807128 |
| H | -1.994084 | 1.992516  | -0.293739 |
| H | -2.255802 | 1.099580  | -1.898089 |
| H | -3.051302 | -0.938037 | -0.684847 |
| H | -2.871418 | -0.054771 | 0.935997  |
| H | -0.462084 | 2.478057  | 2.501381  |
| H | -0.269389 | -1.243354 | 5.349182  |
| H | 1.203428  | -1.481038 | -4.473501 |
| H | 1.464407  | -2.187858 | -2.826227 |
| H | -0.185187 | -2.195873 | -3.557178 |
| H | 2.329961  | 0.914726  | -3.897252 |
| H | 1.937554  | 1.896837  | -2.402389 |
| H | 2.790879  | 0.331339  | -2.228727 |
| H | -0.159357 | 0.881078  | -4.869275 |
| H | -1.626774 | 0.351643  | -3.965639 |
| H | -0.821784 | 1.910933  | -3.544491 |

-----  
Energy E(RB-P86) -2393.20668424 a.u.  
-6283364.15 kJ/mol  
-1501759.93 kcal/mol

SCF Convergence: 0.9381D-08  
Maximum Force: 0.000002

<S\*\*2>: 0.0000

Charge: 0.0000

ZPE-correction: 0.246561 a.u.

Lowest Frequency -83.0336 cm-1

-----  
**p7**

Atom Coordinates (x,y,z) in Angstrom

|    |           |           |           |
|----|-----------|-----------|-----------|
| Ru | -0.268851 | -0.208666 | -0.263234 |
| Cl | 2.004092  | -1.103827 | -0.263458 |
| Cl | 0.838360  | 2.105113  | -0.015566 |
| C  | -0.255292 | -0.218138 | 1.717823  |
| C  | -0.739775 | -2.009352 | -0.592916 |
| P  | 0.185289  | 0.280645  | -2.664726 |
| H  | 0.075891  | -2.764096 | -0.632331 |
| H  | -1.743871 | -2.429056 | -0.824648 |
| C  | -0.856620 | 1.587099  | -3.460678 |
| C  | -0.011287 | -1.163792 | -3.805952 |
| C  | 1.897723  | 0.853618  | -3.004154 |
| P  | -0.733422 | -1.629162 | 2.713115  |
| C  | -0.200468 | -1.046113 | 4.363982  |
| C  | 0.118702  | 0.274101  | 4.393593  |
| P  | 0.456754  | 1.029838  | 2.757851  |
| H  | 0.223870  | -2.617649 | 2.299885  |
| H  | 0.348343  | 0.818398  | 5.326172  |
| H  | -0.299900 | 2.238124  | 2.691716  |
| C  | -2.486584 | -0.061722 | -0.453561 |
| C  | -1.991574 | 1.230403  | -0.231545 |
| H  | -2.027600 | 1.684301  | 0.770653  |
| H  | -1.878867 | 1.954572  | -1.050107 |
| H  | -2.793757 | -0.374273 | -1.466191 |

|   |           |           |           |
|---|-----------|-----------|-----------|
| H | -2.945036 | -0.638444 | 0.367134  |
| H | -0.292176 | -1.677824 | 5.263517  |
| H | 2.040311  | 1.024504  | -4.091015 |
| H | 2.066958  | 1.782928  | -2.426376 |
| H | 2.596698  | 0.084470  | -2.622294 |
| H | 0.242931  | -0.896620 | -4.852516 |
| H | 0.664937  | -1.970800 | -3.459493 |
| H | -1.054624 | -1.535992 | -3.765366 |
| H | -0.571548 | 1.715124  | -4.525211 |
| H | -1.931891 | 1.322380  | -3.406427 |
| H | -0.691167 | 2.542956  | -2.924554 |

-----

Energy E(RB-P86) -2393.20924264 a.u.  
-6283370.87 kJ/mol  
-1501761.54 kcal/mol

SCF Convergence: 0.5204D-08

Maximum Force: 0.000076

<S\*\*2>: 0.0000

Charge: 0.0000

ZPE-correction: 0.246396 a.u.

Lowest Frequency 30.6393 cm-1

-----

**(p7-p8)#**

Atom Coordinates (x,y,z) in Angstrom

-----

|    |           |           |           |
|----|-----------|-----------|-----------|
| Ru | -0.181531 | -0.106637 | -0.215085 |
| Cl | 1.953903  | -1.411195 | -0.566931 |
| Cl | 1.092122  | 2.002002  | 0.034411  |
| C  | -0.216360 | -0.221924 | 1.745996  |
| C  | -0.435881 | -1.994170 | -0.490700 |
| P  | 0.093841  | 0.331650  | -2.683501 |
| H  | -0.068507 | -2.770671 | 0.211861  |
| H  | -0.925951 | -2.448610 | -1.382199 |
| C  | -0.973928 | 1.651158  | -3.432898 |
| C  | -0.193707 | -1.100093 | -3.827415 |
| C  | 1.784479  | 0.892814  | -3.159131 |
| P  | -0.983516 | -1.513388 | 2.743056  |
| C  | -0.501760 | -0.967186 | 4.417683  |
| C  | -0.010980 | 0.298626  | 4.455627  |
| P  | 0.534580  | 0.981213  | 2.844139  |
| H  | -0.195421 | -2.683829 | 2.471213  |
| H  | 0.215352  | 0.825650  | 5.399121  |
| H  | -0.134564 | 2.235868  | 2.710555  |
| C  | -2.365193 | -0.175442 | -0.473956 |
| C  | -1.950834 | 1.156670  | -0.200798 |
| H  | -2.100839 | 1.580561  | 0.805358  |
| H  | -1.892245 | 1.909406  | -1.000091 |
| H  | -2.642169 | -0.480799 | -1.498541 |
| H  | -2.844344 | -0.775099 | 0.318935  |
| H  | -0.745317 | -1.561116 | 5.314862  |
| H  | 1.839694  | 1.117820  | -4.244045 |
| H  | 2.026997  | 1.790238  | -2.556615 |
| H  | 2.505093  | 0.096991  | -2.889252 |
| H  | -0.002589 | -0.822179 | -4.884305 |
| H  | 0.491651  | -1.922531 | -3.539484 |
| H  | -1.238383 | -1.462602 | -3.737171 |
| H  | -0.745851 | 1.776573  | -4.511545 |
| H  | -2.048082 | 1.398637  | -3.323578 |
| H  | -0.778176 | 2.609181  | -2.910394 |

-----

Energy E(RB-P86) -2393.19711043 a.u.  
-6283339.01 kJ/mol  
-1501753.92 kcal/mol



SCF Convergence: 0.9122D-08  
 Maximum Force: 0.000017  
 <S\*\*2>: 0.0000  
 Charge: 0.0000  
 ZPE-correction: 0.245733 a.u.  
 Lowest Frequency -224.6514 cm-1

**p8**

Atom Coordinates (x,y,z) in Angstrom

|    |           |           |           |
|----|-----------|-----------|-----------|
| Ru | -0.174601 | -0.125342 | -0.300225 |
| Cl | 2.219981  | -0.360185 | -0.078651 |
| Cl | 0.219105  | 2.323123  | 0.275964  |
| C  | -0.349797 | -0.398306 | 1.662231  |
| C  | -0.711315 | -2.000092 | -0.695574 |
| P  | 0.413838  | 0.406141  | -2.638712 |
| H  | -0.778975 | -2.761503 | 0.111082  |
| H  | -0.509787 | -2.474720 | -1.675598 |
| C  | -0.905009 | 1.083266  | -3.760503 |
| C  | 1.084627  | -1.007759 | -3.632792 |
| C  | 1.739832  | 1.675739  | -2.790491 |
| P  | -0.195693 | -1.935168 | 2.567029  |
| C  | -0.180172 | -1.319042 | 4.282347  |
| C  | -0.533928 | -0.008525 | 4.389239  |
| P  | -0.417072 | 0.925765  | 2.825319  |
| H  | 1.123655  | -2.406722 | 2.261768  |
| H  | -0.682906 | 0.499840  | 5.357349  |
| H  | -1.583676 | 1.736657  | 2.700135  |
| C  | -2.093727 | -1.119855 | -0.714274 |
| C  | -2.090471 | 0.447203  | -0.543026 |
| H  | -2.633582 | 0.795883  | 0.354536  |
| H  | -2.382885 | 0.999755  | -1.452745 |
| H  | -2.504728 | -1.318301 | -1.722886 |
| H  | -2.705912 | -1.543646 | 0.104625  |
| H  | -0.044582 | -1.995085 | 5.142859  |
| H  | -0.504042 | 1.283831  | -4.775458 |
| H  | -1.749580 | 0.369430  | -3.851727 |
| H  | -1.288977 | 2.032906  | -3.335826 |
| H  | 1.965793  | 1.894648  | -3.854324 |
| H  | 1.408772  | 2.587854  | -2.255967 |
| H  | 2.637108  | 1.289339  | -2.269375 |
| H  | 1.446697  | -0.673628 | -4.626985 |
| H  | 1.923869  | -1.454983 | -3.063360 |
| H  | 0.305393  | -1.783310 | -3.779980 |

Energy E (RB-P86) -2393.20180939 a.u.  
 -6283351.35 kJ/mol  
 -1501756.87 kcal/mol

SCF Convergence: 0.3313D-08  
 Maximum Force: 0.000062  
 <S\*\*2>: 0.0000  
 Charge: 0.0000  
 ZPE-correction: 0.247303 a.u.  
 Lowest Frequency 27.6406 cm-1

**(p1-p9)≠**

Atom Coordinates (x,y,z) in Angstrom

|    |           |           |           |
|----|-----------|-----------|-----------|
| Ru | 0.349037  | 0.269132  | 0.001239  |
| Cl | -0.149006 | 0.281237  | 2.303477  |
| Cl | -0.430461 | 0.360896  | -2.218108 |
| C  | 0.289955  | -1.703663 | 0.022050  |
| C  | 2.180766  | 0.250747  | -0.132285 |
| P  | 0.428859  | 2.734092  | 0.009796  |

|   |           |           |           |
|---|-----------|-----------|-----------|
| H | 2.777090  | -0.688427 | -0.112423 |
| H | 2.795392  | 1.173312  | -0.229663 |
| C | 1.228152  | 3.536375  | -1.453299 |
| C | 1.307867  | 3.478862  | 1.456075  |
| C | -1.230004 | 3.549019  | 0.066169  |
| P | 0.729451  | -2.730520 | -1.362894 |
| C | 0.641229  | -4.390855 | -0.617311 |
| C | -0.023339 | -4.406748 | 0.570821  |
| P | -0.168135 | -2.775845 | 1.379334  |
| H | 2.095870  | -2.449368 | -1.698171 |
| H | -0.304816 | -5.336389 | 1.094651  |
| H | -1.551346 | -2.603314 | 1.698646  |
| H | 0.927605  | -5.299716 | -1.172771 |
| H | 1.269429  | 4.587844  | 1.443007  |
| H | 0.835256  | 3.092009  | 2.380896  |
| H | 2.367165  | 3.151195  | 1.455336  |
| H | -1.146572 | 4.654137  | 0.123025  |
| H | -1.792731 | 3.268083  | -0.846124 |
| H | -1.784948 | 3.170884  | 0.947803  |
| H | 1.198198  | 4.643482  | -1.387885 |
| H | 2.284258  | 3.207330  | -1.530953 |
| H | 0.698420  | 3.196453  | -2.365418 |
| C | -3.486789 | -0.710840 | 0.003038  |
| C | -3.690616 | 0.607499  | -0.149233 |
| H | -3.844085 | -1.251794 | 0.895703  |
| H | -2.943139 | -1.295347 | -0.757675 |
| H | -4.222198 | 1.206231  | 0.609527  |
| H | -3.321456 | 1.137012  | -1.043002 |

-----

Energy E(RB-P86) -2393.20189660 a.u.  
-6283351.58 kJ/mol  
-1501756.93 kcal/mol

SCF Convergence: 0.3010D-08  
Maximum Force: 0.000263

<S\*\*2>: 0.0000  
Charge: 0.0000  
ZPE-correction: 0.242642 a.u.  
Lowest Frequency -33.9565 cm-1

**p9**

Atom Coordinates (x,y,z) in Angstrom

|    |           |           |           |
|----|-----------|-----------|-----------|
| Ru | 0.264443  | -0.004019 | -0.020225 |
| Cl | 0.213508  | 2.412399  | -0.014084 |
| Cl | 0.186956  | -2.372719 | -0.558517 |
| C  | -1.722887 | 0.005220  | 0.207252  |
| C  | 0.385581  | -0.284059 | 1.831600  |
| P  | 2.727842  | 0.001017  | 0.104927  |
| H  | -0.505865 | -0.362165 | 2.493409  |
| H  | 1.323221  | -0.422643 | 2.415208  |
| C  | 3.446642  | -1.564047 | 0.786045  |
| C  | 3.372380  | 1.307646  | 1.248041  |
| C  | 3.804341  | 0.275399  | -1.380511 |
| P  | -2.710218 | -1.465205 | 0.386709  |
| C  | -4.325508 | -0.745773 | 0.838755  |
| C  | -4.403778 | 0.595283  | 0.623968  |
| P  | -2.780632 | 1.413872  | 0.466847  |
| H  | -2.238790 | -2.229099 | 1.498473  |
| H  | -5.338580 | 1.175330  | 0.707846  |
| H  | -2.838459 | 2.250634  | -0.689323 |
| H  | -5.195153 | -1.378706 | 1.083668  |
| H  | 4.479492  | 1.283993  | 1.313649  |
| H  | 3.028991  | 2.292098  | 0.871993  |

|   |           |           |           |
|---|-----------|-----------|-----------|
| H | 2.944037  | 1.170173  | 2.260618  |
| H | 4.875361  | 0.254439  | -1.091401 |
| H | 3.620450  | -0.513753 | -2.135561 |
| H | 3.574204  | 1.259767  | -1.833827 |
| H | 4.547552  | -1.491324 | 0.901546  |
| H | 2.990493  | -1.787935 | 1.770875  |
| H | 3.187815  | -2.398187 | 0.104070  |
| C | -0.608828 | 0.219395  | -2.330969 |
| C | 0.765121  | 0.227624  | -2.412287 |
| H | -1.172708 | 1.163428  | -2.304908 |
| H | -1.177707 | -0.712717 | -2.469199 |
| H | 1.308184  | 1.182443  | -2.475568 |
| H | 1.310790  | -0.698882 | -2.646054 |

-----  
Energy E (RB-P86) -2393.20571671 a.u.  
-6283361.61 kJ/mol  
-1501759.32 kcal/mol

SCF Convergence: 0.5662D-08  
Maximum Force: 0.000094  
<S\*\*2>: 0.0000  
Charge: 0.0000  
ZPE-correction: 0.245683 a.u.  
Lowest Frequency 27.1114 cm-1

---

## p'1

Atom Coordinates (x,y,z) in Angstrom

```

-----
Ru  0.347848  0.190286  0.200580
Cl  0.356835  2.494361 -0.284524
Cl  0.385058 -2.021218 -0.630361
C   -1.643570  0.194566  0.194548
C   0.449340  0.045066  2.024710
P   2.783670  0.193899 -0.018527
H   -0.448396  0.125421  2.673969
H   1.407715 -0.108339  2.571859
C   3.686394 -1.293146  0.612688
C   3.669958  1.606439  0.781761
C   3.325820  0.298539 -1.784142
P  -2.701084 -1.127052  0.683337
C  -4.357030 -0.437140  0.469659
C  -4.345077  0.706202 -0.271424
P  -2.703213  1.490285 -0.448195
C  -2.459955 -1.894077  2.326564
H  -5.254370  1.199054 -0.654133
C  -2.467415  1.785288 -2.254380
H  -5.269432 -0.988686  0.751047
H   4.760115  1.588610  0.575563
H   3.224881  2.549069  0.405502
H   3.503770  1.566175  1.877680
H   4.431482  0.317312 -1.879329
H   2.920856 -0.576503 -2.331213
H   2.899315  1.219198 -2.231053
H   4.774762 -1.242833  0.402675
H   3.532311 -1.377978  1.707884
H   3.247048 -2.191520  0.134900
C  -3.332972 -1.610582  3.403433
C  -3.153732 -2.254240  4.639741
C  -2.103990 -3.173664  4.814893
C  -1.413007 -2.830241  2.500691
C  -1.233942 -3.454797  3.745576
H  -4.144358 -0.876496  3.278811
H  -3.836526 -2.027648  5.474242
H  -1.966050 -3.674522  5.786329
H  -0.742663 -3.056514  1.654958
H  -0.412619 -4.177312  3.876655
C  -2.126444  0.733363 -3.134147
C  -1.966641  0.992872 -4.505766
C  -2.152115  2.293693 -5.008435
C  -2.641035  3.091576 -2.759409
C  -2.491114  3.341386 -4.134393
H  -1.977338 -0.285336 -2.742575
H  -1.694951  0.170023 -5.186329
H  -2.026265  2.492165 -6.084823
H  -2.882046  3.917777 -2.071486
H  -2.629276  4.363258 -4.522342
-----

```

```

Energy E(RB-P86)  -2776.45403795 a.u.
                  -7289580.08 kJ/mol
                  -1742251.29 kcal/mol

```

```

SCF Convergence: 0.3588D-08

```

```

Maximum Force: 0.000048

```

```

<S**2>: 0.0000

```

```

Charge: 0.0000

```

```

ZPE-correction: 0.353608 a.u.

```

```

Lowest Frequency 22.1385 cm-1
-----

```

**p'2**

Atom Coordinates (x, y, z) in Angstrom

```

-----
Ru  1.250772  -0.083426  0.259479
Cl  1.584487  2.016892  1.106396
Cl  2.171028  -1.268897  -1.467335
C   -0.579369  -0.140852  -0.032287
C   1.299766  -1.238593  1.659787
H   0.427714  -1.856477  1.977591
H   2.249226  -1.381289  2.226874
P   -1.863793  -0.732579  1.158796
C   -3.289234  -0.120953  0.180480
C   -3.050908  0.328146  -1.074914
P   -1.303381  0.567728  -1.586080
C   -1.798520  0.406695  2.619896
H   -3.859338  0.633244  -1.762211
C   -1.051054  -0.735111  -2.886296
H   -4.307055  -0.214813  0.598474
C   -1.555944  -2.047013  -2.748002
C   -1.364442  -2.985097  -3.774446
C   -0.669125  -2.622878  -4.943550
C   -0.355868  -0.375402  -4.060178
C   -0.165536  -1.318990  -5.085100
H   -2.100771  -2.334786  -1.834398
H   -1.758020  -4.007790  -3.660057
H   -0.519820  -3.362154  -5.746557
H   0.039493   0.647211  -4.169340
H   0.380881  -1.032031  -5.997529
C   -1.884857  1.810791  2.485686
C   -1.853563  2.628637  3.626458
C   -1.735908  2.055843  4.906387
C   -1.680355  -0.163330  3.906187
C   -1.649009  0.660151  5.045679
H   -1.975157  2.263588  1.485912
H   -1.914012  3.722776  3.514122
H   -1.710089  2.701617  5.798490
H   -1.619398  -1.258487  4.016059
H   -1.559648  0.207398  6.046026
-----

```

```

Energy E(RB-P86)  -2315.48692478 a.u.
                  -6079310.92 kJ/mol
                  -1452990.04 kcal/mol

```

SCF Convergence: 0.5612D-08

Maximum Force: 0.000038

&lt;S\*\*2&gt;: 0.0000

Charge: 0.0000

ZPE-correction: 0.242152 a.u.

Lowest Frequency 15.1168 cm-1

**p'3**

Atom Coordinates (x, y, z) in Angstrom

```

-----
Ru  -0.001618  -1.489285  -0.107935
C   1.750332  -1.634592  -0.652249
C   0.096449   0.464573  -0.212172
Cl  -1.146314  -1.489760  -2.167202
Cl   0.085424  -1.333782  2.247762
H   2.288699  -2.604880  -0.677013
H   2.330148  -0.758936  -1.009519
C   -1.106248  -3.582927  0.165602
C   0.230321  -3.884108  0.286250
H   -1.718120  -3.364233  1.057610
H   -1.643405  -3.734847  -0.782906
-----

```

|   |           |           |           |
|---|-----------|-----------|-----------|
| H | 0.789441  | -4.280812 | -0.576999 |
| H | 0.730490  | -3.908372 | 1.266703  |
| P | -0.936782 | 1.496666  | -1.254388 |
| P | 1.071029  | 1.538827  | 0.795226  |
| C | -0.436679 | 3.148282  | -0.665032 |
| C | 0.671078  | 3.167204  | 0.129495  |
| C | -2.738639 | 1.341804  | -0.887166 |
| C | 2.874099  | 1.245562  | 0.899839  |
| H | 1.164462  | 4.084889  | 0.490143  |
| H | -0.942990 | 4.056072  | -1.033342 |
| C | -3.214324 | 1.350109  | 0.443297  |
| C | -4.592575 | 1.242448  | 0.693153  |
| C | -5.499858 | 1.133333  | -0.376783 |
| C | -3.649038 | 1.222924  | -1.958157 |
| C | -5.027415 | 1.125269  | -1.700694 |
| H | -2.504620 | 1.428457  | 1.282228  |
| H | -4.958822 | 1.241348  | 1.732204  |
| H | -6.579808 | 1.048053  | -0.176426 |
| H | -3.275615 | 1.191697  | -2.993726 |
| H | -5.734469 | 1.032054  | -2.540284 |
| C | 3.788563  | 2.050300  | 0.179578  |
| C | 5.170207  | 1.835831  | 0.318819  |
| C | 5.648203  | 0.819446  | 1.165361  |
| C | 3.357049  | 0.232361  | 1.761717  |
| C | 4.739898  | 0.017699  | 1.880266  |
| H | 3.419321  | 2.834378  | -0.499759 |
| H | 5.877124  | 2.464375  | -0.245937 |
| H | 6.732241  | 0.654065  | 1.269935  |
| H | 2.640032  | -0.382849 | 2.330305  |
| H | 5.109976  | -0.777205 | 2.547096  |

-----  
Energy E(RB-P86) -2394.02418075 a.u.  
-6285510.49 kJ/mol  
-1502272.92 kcal/mol

SCF Convergence: 0.1410D-08  
Maximum Force: 0.000062  
<S\*\*2>: 0.0000  
Charge: 0.0000  
ZPE-correction: 0.295401 a.u.  
Lowest Frequency 17.8163 cm-1

---

**p' 4**

Atom Coordinates (x,y,z) in Angstrom

|    |           |           |           |
|----|-----------|-----------|-----------|
| Ru | 0.150623  | -1.200378 | 0.112578  |
| C  | 0.485351  | -1.841490 | -1.562772 |
| C  | -0.100521 | 0.745199  | -0.136448 |
| Cl | 2.531980  | -0.613679 | 0.218424  |
| Cl | -2.238052 | -1.378228 | -0.247496 |
| H  | 1.498527  | -1.792778 | -2.011784 |
| H  | -0.342438 | -2.295931 | -2.147848 |
| C  | 0.982910  | -2.691906 | 1.612091  |
| C  | -0.389215 | -2.907574 | 1.489393  |
| H  | 1.716246  | -3.309890 | 1.071615  |
| H  | -0.792952 | -3.708764 | 0.850548  |
| H  | -1.103076 | -2.477507 | 2.211683  |
| H  | 1.395854  | -2.080354 | 2.430735  |
| P  | -1.527669 | 1.590777  | 0.489922  |
| P  | 1.017291  | 1.940928  | -0.788880 |
| C  | -1.007899 | 3.310628  | 0.274107  |
| C  | 0.075187  | 3.461350  | -0.546999 |
| C  | -1.912940 | 1.311903  | 2.270575  |
| C  | 1.516355  | 1.773227  | -2.542532 |

|   |           |           |           |
|---|-----------|-----------|-----------|
| H | 0.449520  | 4.435996  | -0.901306 |
| H | -1.612116 | 4.148163  | 0.660320  |
| C | 0.824154  | 2.477959  | -3.557084 |
| C | 1.246732  | 2.376118  | -4.892123 |
| C | 2.351728  | 1.572152  | -5.226638 |
| C | 2.630268  | 0.971511  | -2.879323 |
| C | 3.036645  | 0.868803  | -4.220558 |
| H | -0.052711 | 3.093124  | -3.302437 |
| H | 0.701167  | 2.923298  | -5.677412 |
| H | 2.677668  | 1.493410  | -6.275990 |
| H | 3.160147  | 0.425978  | -2.081792 |
| H | 3.902611  | 0.238293  | -4.477649 |
| C | -1.215509 | 2.031740  | 3.269269  |
| C | -1.539698 | 1.844276  | 4.623065  |
| C | -2.555387 | 0.942337  | 4.989046  |
| C | -2.934258 | 0.408452  | 2.639348  |
| C | -3.247427 | 0.224940  | 3.997701  |
| H | -0.412698 | 2.730320  | 2.986273  |
| H | -0.989786 | 2.403341  | 5.396849  |
| H | -2.806565 | 0.798282  | 6.051975  |
| H | -3.457129 | -0.165516 | 1.858548  |
| H | -4.042980 | -0.482490 | 4.280816  |

-----  
Energy E(RB-P86) -2394.01740625 a.u.  
-6285492.70 kJ/mol  
-1502268.67 kcal/mol

SCF Convergence: 0.3687D-08

Maximum Force: 0.000492

<S\*\*2>: 0.0000

Charge: 0.0000

ZPE-correction: 0.295545 a.u.

Lowest Frequency 15.3118 cm-1

-----  
**(p' 4-p' 5)≠**

Atom Coordinates (x,y,z) in Angstrom

|    |           |           |           |
|----|-----------|-----------|-----------|
| Ru | -0.086833 | 1.462350  | 0.300016  |
| C  | 1.522519  | 1.995951  | 0.979161  |
| C  | 0.075203  | -0.469238 | -0.014096 |
| Cl | 0.927560  | 1.751488  | -1.896627 |
| Cl | -1.124612 | 0.928665  | 2.394902  |
| H  | 2.388250  | 2.257984  | 0.334976  |
| H  | 1.648339  | 2.064886  | 2.083610  |
| C  | -1.339189 | 3.210870  | -0.455008 |
| C  | -1.003714 | 3.658082  | 0.811192  |
| H  | -0.865852 | 3.608017  | -1.365402 |
| H  | -0.198492 | 4.398356  | 0.944639  |
| H  | -1.609689 | 3.411466  | 1.695283  |
| H  | -2.262993 | 2.617185  | -0.602413 |
| P  | -1.128316 | -1.658561 | 0.530737  |
| P  | 1.306984  | -1.320175 | -0.947769 |
| C  | -0.510708 | -3.150214 | -0.286873 |
| C  | 0.761073  | -3.031463 | -0.775374 |
| C  | -2.865454 | -1.374934 | -0.014654 |
| C  | 3.047300  | -1.136537 | -0.409065 |
| H  | 1.345753  | -3.872083 | -1.184292 |
| H  | -1.072893 | -4.098311 | -0.255802 |
| C  | 3.632136  | -2.065829 | 0.484072  |
| C  | 4.981135  | -1.929146 | 0.849886  |
| C  | 5.750516  | -0.868937 | 0.336280  |
| C  | 3.822548  | -0.074337 | -0.928048 |
| C  | 5.168591  | 0.057600  | -0.546439 |
| H  | 3.028676  | -2.887715 | 0.899855  |

|   |           |           |           |
|---|-----------|-----------|-----------|
| H | 5.431547  | -2.653370 | 1.547238  |
| H | 6.808118  | -0.765693 | 0.626968  |
| H | 3.353885  | 0.648027  | -1.616338 |
| H | 5.768098  | 0.889098  | -0.949824 |
| C | -3.291788 | -1.800564 | -1.295272 |
| C | -4.625622 | -1.605995 | -1.690176 |
| C | -5.538926 | -0.985919 | -0.818066 |
| C | -3.785122 | -0.756359 | 0.860807  |
| C | -5.115679 | -0.559373 | 0.452875  |
| H | -2.576357 | -2.272816 | -1.986596 |
| H | -4.950366 | -1.935783 | -2.689911 |
| H | -6.583923 | -0.834056 | -1.132045 |
| H | -3.443493 | -0.410056 | 1.848516  |
| H | -5.827027 | -0.072055 | 1.138434  |

-----  
 Energy E (RB-P86) -2394.01382978 a.u.  
                   -6285483.31 kJ/mol  
                   -1502266.42 kcal/mol

SCF Convergence: 0.9667D-08

Maximum Force: 0.000008

<S\*\*2>: 0.0000

Charge: 0.0000

ZPE-correction: 0.294721 a.u.

Lowest Frequency -64.8023 cm<sup>-1</sup>

---

**P' 5**

Atom Coordinates (x,y,z) in Angstrom

-----

|    |           |           |           |
|----|-----------|-----------|-----------|
| Ru | 1.369332  | 0.043663  | 0.057783  |
| Cl | 1.262464  | 2.318110  | 0.763960  |
| Cl | 1.467421  | -2.230970 | -0.648779 |
| C  | -0.548946 | -0.017452 | -0.023280 |
| C  | 2.792996  | -0.398411 | 1.379509  |
| C  | 3.663298  | 0.116674  | 0.155268  |
| C  | 2.869060  | 0.579285  | -1.139506 |
| H  | 2.829536  | 0.273796  | 2.256666  |
| H  | 2.932962  | -1.472080 | 1.600809  |
| H  | 4.227089  | 1.000138  | 0.510861  |
| H  | 4.309671  | -0.728598 | -0.148901 |
| H  | 3.022335  | -0.086577 | -2.008838 |
| H  | 2.958792  | 1.660337  | -1.350676 |
| P  | -1.544978 | -1.405648 | 0.438111  |
| C  | -3.202751 | -0.682187 | 0.222668  |
| C  | -3.209608 | 0.477494  | -0.493345 |
| P  | -1.589049 | 1.305641  | -0.570593 |
| C  | -1.305859 | -1.943894 | 2.178098  |
| H  | -4.123489 | 0.975261  | -0.857951 |
| C  | -1.239186 | 1.862688  | -2.285729 |
| H  | -4.110480 | -1.238131 | 0.510494  |
| C  | -0.513449 | 1.059513  | -3.194611 |
| C  | -0.261684 | 1.532514  | -4.493467 |
| C  | -0.734055 | 2.795151  | -4.894400 |
| C  | -1.698301 | 3.137880  | -2.684316 |
| C  | -1.454158 | 3.595525  | -3.989810 |
| H  | -0.145346 | 0.069416  | -2.881882 |
| H  | 0.306629  | 0.904403  | -5.197809 |
| H  | -0.534932 | 3.159730  | -5.914622 |
| H  | -2.237057 | 3.780718  | -1.969157 |
| H  | -1.816580 | 4.589446  | -4.296565 |
| C  | -0.712319 | -1.098358 | 3.142789  |
| C  | -0.541142 | -1.557836 | 4.459497  |
| C  | -0.963686 | -2.849271 | 4.822523  |
| C  | -1.714221 | -3.246999 | 2.539935  |



|   |           |           |          |
|---|-----------|-----------|----------|
| C | -1.552148 | -3.691667 | 3.862571 |
| H | -0.383374 | -0.085851 | 2.859565 |
| H | -0.075676 | -0.896535 | 5.207576 |
| H | -0.828308 | -3.203157 | 5.856863 |
| H | -2.148434 | -3.921068 | 1.783603 |
| H | -1.874642 | -4.707632 | 4.140311 |

---

Energy E (RB-P86) -2394.03942409 a.u.  
-628550.51 kJ/mol  
-1502282.48 kcal/mol

SCF Convergence: 0.6583D-08  
Maximum Force: 0.000008  
<S\*\*2>: 0.0000  
Charge: 0.0000  
ZPE-correction: 0.298228 a.u.  
Lowest Frequency 22.0790 cm-1

---

**pn1**

Atom Coordinates (x,y,z) in Angstrom

```

-----
Ru  0.792630  -0.014170  0.100610
Cl  0.819240  2.319920  -0.117550
Cl  0.862600  -2.061980  -1.034770
C   -1.146250  0.025510  0.073360
C   0.866310  -0.392160  1.895010
P   3.283110  -0.025060  -0.125380
H   -0.033800  -0.439210  2.546120
H   1.832190  -0.580870  2.412750
C   4.292670  -1.533780  0.280700
C   4.343100  1.235580  0.739250
C   3.941060  0.251120  -1.843290
P   -2.214500  -1.373540  0.396670
N   -3.822300  -0.673630  0.329590
C   -3.815000  0.487280  -0.241960
P   -2.204130  1.406690  -0.359070
H   -2.041850  -1.696880  1.785360
H   -4.775410  0.995040  -0.473220
H   -2.024920  1.774240  -1.731020
H   5.033400  0.226310  -1.823350
H   3.570870  -0.535090  -2.505900
H   3.605430  1.224380  -2.209810
H   5.394310  1.049260  0.505870
H   4.066880  2.237330  0.401030
H   4.190830  1.160700  1.818800
H   5.351050  -1.319990  0.112400
H   4.137810  -1.804640  1.328010
H   3.982210  -2.363030  -0.359760
-----

```

```

Energy E(RB-P86)  -2330.71005694 a.u.
                  -6119279.25 kJ/mol
                  -1462542.70 kcal/mol

```

SCF Convergence: 0.4184D-08

Maximum Force: 0.000004

&lt;S\*\*2&gt;: 0.0000

Charge: 0.0000

ZPE-correction: 0.181138 a.u.

Lowest Frequency 32.8626 cm<sup>-1</sup>**pn2**

Atom Coordinates (x,y,z) in Angstrom

```

-----
Ru  1.073204  0.052289  0.117916
Cl  1.359354  1.981429  1.311745
Cl  1.670785  -0.722150  -1.954772
C   -0.759742  -0.128686  0.014940
C   1.389469  -1.331311  1.252752
H   0.619531  -2.064478  1.586380
H   2.427935  -1.488175  1.628728
P   -1.872921  -1.011820  1.205540
N   -3.407671  -0.653006  0.433623
C   -3.344101  -0.110018  -0.730254
P   -1.733258  0.617435  -1.356962
H   -1.915544  -0.027104  2.255635
H   -4.279309  0.066049  -1.304635
H   -1.353303  -0.287852  -2.411602
-----

```

```

Energy E(RB-P86)  -1869.75384020 a.u.
                  -4909038.71 kJ/mol
                  -1173288.30 kcal/mol

```

SCF Convergence: 0.4009D-08

Maximum Force: 0.000033  
 <S\*\*2>: 0.0000  
 Charge: 0.0000  
 ZPE-correction: 0.070167 a.u.  
 Lowest Frequency 45.5897 cm-1

**pn3**

Atom Coordinates (x,y,z) in Angstrom

|    |           |           |           |
|----|-----------|-----------|-----------|
| Ru | -0.888737 | -0.042321 | 0.054760  |
| Cl | -0.714570 | -2.338515 | -0.441335 |
| Cl | -0.893939 | 2.194172  | -0.662687 |
| C  | 1.043207  | 0.002469  | 0.107609  |
| C  | -0.979934 | -0.005751 | 1.890890  |
| H  | -0.085604 | -0.048168 | 2.548506  |
| H  | -1.956075 | 0.039549  | 2.415737  |
| C  | -3.352387 | 0.347055  | 0.192780  |
| C  | -3.076216 | -0.350449 | -0.954202 |
| H  | -3.377376 | 1.447124  | 0.212336  |
| H  | -3.706131 | -0.183848 | 1.092073  |
| H  | -3.207919 | -1.441130 | -1.011933 |
| H  | -2.878764 | 0.176408  | -1.904216 |
| P  | 2.042177  | 1.388687  | 0.638476  |
| N  | 3.673719  | 0.755492  | 0.556710  |
| C  | 3.734289  | -0.322139 | -0.158438 |
| P  | 2.167364  | -1.273915 | -0.447735 |
| H  | 1.809716  | 1.549764  | 2.045883  |
| H  | 4.721537  | -0.762700 | -0.412733 |
| H  | 2.056760  | -1.498175 | -1.856625 |

Energy E(RB-P86) -1948.28391608 a.u.  
 -5115219.42 kJ/mol  
 -1222566.67 kcal/mol

SCF Convergence: 0.6801D-08

Maximum Force: 0.000011

&lt;S\*\*2&gt;: 0.0000

Charge: 0.0000

ZPE-correction: 0.123004 a.u.

Lowest Frequency 34.6405 cm-1

**pn4**

no local minimum located

**(pn4-pn5) #**

Atom Coordinates (x,y,z) in Angstrom

|    |           |           |           |
|----|-----------|-----------|-----------|
| Ru | -0.871789 | -0.036414 | 0.087019  |
| Cl | -0.775948 | -2.414154 | -0.019336 |
| Cl | -0.822328 | 2.355976  | -0.068494 |
| C  | -1.268980 | 0.087360  | 1.878784  |
| C  | 1.060780  | -0.006777 | -0.073905 |
| P  | 2.142325  | 1.336416  | 0.361185  |
| N  | 3.727735  | 0.681588  | 0.011446  |
| C  | 3.665251  | -0.369354 | -0.744576 |
| P  | 2.052130  | -1.280718 | -0.809778 |
| C  | -2.869949 | -0.294459 | -0.937026 |
| C  | -3.310429 | 0.203281  | 0.286935  |
| H  | 2.166337  | 1.486864  | 1.786602  |
| H  | 4.592541  | -0.810160 | -1.166709 |
| H  | 1.724625  | -1.503348 | -2.186904 |
| H  | -2.982861 | -1.360377 | -1.188996 |
| H  | -2.685507 | 0.409897  | -1.769934 |
| H  | -3.754221 | -0.477420 | 1.031439  |
| H  | -3.424672 | 1.285447  | 0.454710  |
| H  | -1.697560 | -0.780731 | 2.426195  |

```

H   -1.080270   1.014178   2.465381
-----
Energy E(RB-P86)  -1948.27358042 a.u.
                   -5115192.29 kJ/mol
                   -1222560.18 kcal/mol
SCF Convergence: 0.7596D-08
  Maximum Force: 0.000116
<S**2>:   0.0000
Charge:   0.0000
ZPE-correction:      0.122628 a.u.
Lowest Frequency  -160.0297 cm-1

```

**pn5**

Atom Coordinates (x,y,z) in Angstrom

```

-----
Ru  0.832432   0.018588   0.006844
Cl  0.735344   2.337645   0.542117
Cl  0.840742  -2.295048  -0.523663
C   -1.076120   0.008110  -0.068579
C    2.195208  -0.385748   1.403759
C    3.126399   0.054038   0.191689
C    2.396701   0.492851  -1.146558
H    2.202916   0.330845   2.245689
H    2.312660  -1.447140   1.689339
H    3.698847   0.936133   0.536673
H    3.763710  -0.817517  -0.051417
H    2.542534  -0.212466  -1.985612
H    2.532497   1.559317  -1.399452
P   -2.082323  -1.413428   0.324606
N   -3.694483  -0.743955   0.250056
C   -3.730367   0.395460  -0.367345
P   -2.147825   1.352450  -0.504121
H   -1.943918  -1.744164   1.712819
H   -4.705227   0.863354  -0.618582
H   -1.981810   1.723685  -1.879743
-----
Energy E(RB-P86)  -1948.29651406 a.u.
                   -5115252.50 kJ/mol
                   -1222574.57 kcal/mol
SCF Convergence: 0.5556D-08
  Maximum Force: 0.000001
<S**2>:   0.0000
Charge:   0.0000
ZPE-correction:      0.126021 a.u.
Lowest Frequency   31.0913 cm-1

```

**pla**

Atom Coordinates (x,y,z) in Angstrom

|    |           |           |           |
|----|-----------|-----------|-----------|
| Ru | 0.797979  | -0.007529 | 0.110198  |
| Cl | 0.810343  | 2.329074  | -0.112961 |
| Cl | 0.883626  | -2.066820 | -1.007021 |
| C  | -1.148632 | 0.008283  | 0.061308  |
| C  | 0.859155  | -0.379640 | 1.905319  |
| P  | 3.280420  | 0.004149  | -0.102140 |
| H  | -0.049858 | -0.441105 | 2.543562  |
| H  | 1.820115  | -0.550875 | 2.438648  |
| H  | 4.068625  | -1.149590 | 0.220077  |
| H  | 4.086735  | 0.984013  | 0.565547  |
| H  | 3.797594  | 0.215681  | -1.419539 |
| P  | -2.177687 | -1.412247 | 0.376672  |
| C  | -3.831934 | -0.659687 | 0.266292  |
| C  | -3.829156 | 0.562805  | -0.332489 |
| P  | -2.203688 | 1.395279  | -0.369371 |
| H  | -1.939201 | -1.805146 | 1.736760  |
| H  | -4.751038 | 1.095599  | -0.622289 |
| H  | -1.974937 | 1.759262  | -1.734518 |
| H  | -4.748867 | -1.233178 | 0.482715  |

Energy E(RB-P86) -2196.80218908 a.u.  
-5767704.15 kJ/mol  
-1378514.24 kcal/mol

SCF Convergence: 0.5353D-08

Maximum Force: 0.000057

&lt;S\*\*2&gt;: 0.0000

Charge: 0.0000

ZPE-correction: 0.107940 a.u.

Lowest Frequency 36.2488 cm-1

**n1**

Atom Coordinates (x,y,z) in Angstrom

```

-----
Ru -0.019067  0.054732  0.086260
Cl -0.101700  1.609667 -1.705074
Cl -0.036737 -2.226410  0.741755
C  -2.057504 -0.004056  0.048126
C  -0.023969  1.040477  1.631623
P   2.373002  0.044201  0.006468
N  -2.887277 -0.941621  0.596119
C  -4.222879 -0.681614  0.323449
C  -4.242527  0.479235 -0.416476
N  -2.917906  0.868205 -0.557448
H  -2.475708 -1.767670  1.051338
H  -5.040383 -1.320838  0.671568
H  -5.080413  1.044740 -0.836308
H  -2.533377  1.639075 -1.120349
H  -0.961798  1.352623  2.145504
H   0.903829  1.384027  2.145855
C   3.239966 -0.751650  1.435488
C   3.198705  1.695673 -0.127366
C   3.053018 -0.874956 -1.450713
H   4.301773  1.608213 -0.211157
H   2.789516  2.215547 -1.016664
H   2.948173  2.303618  0.765666
H   4.162865 -0.865710 -1.465681
H   2.693352 -1.922964 -1.411531
H   2.667693 -0.407665 -2.379361
H   4.341790 -0.764297  1.304106
H   2.990326 -0.203340  2.366568
H   2.857149 -1.786691  1.538931
-----

```

```

Energy E (RB-P86)  -1741.62940240 a.u.
                   -4572648.00 kJ/mol
                   -1092889.00 kcal/mol

```

SCF Convergence: 0.1758D-08

Maximum Force: 0.000003

&lt;S\*\*2&gt;: 0.0000

Charge: 0.0000

ZPE-correction: 0.209104 a.u.

Lowest Frequency 33.8932 cm-1

**n2**

Atom Coordinates (x,y,z) in Angstrom

```

-----
Ru -0.882461  0.001311  0.103986
Cl -1.033295 -2.221561 -0.584624
Cl -1.027080  2.223363 -0.588237
C   1.029948 -0.001448  0.032713
C  -0.987982  0.003005  1.913428
N   1.877797  1.078390  0.000522
C   3.206331  0.683023 -0.076941
C   3.204326 -0.691897 -0.078979
N   1.874664 -1.083631 -0.002754
H   1.493395  2.028554 -0.056101
H   4.035689  1.395891 -0.114005
H   4.031617 -1.407056 -0.118079
H   1.487384 -2.032529 -0.061592
H  -0.153878  0.002294  2.647900
H  -2.022491  0.005121  2.339446
-----

```

```

Energy E (RB-P86)  -1280.65209275 a.u.
                   -3362352.07 kJ/mol

```

-803621.35 kcal/mol  
 SCF Convergence: 0.5750D-08  
 Maximum Force: 0.000008  
 <S\*\*2>: 0.0000  
 Charge: 0.0000  
 ZPE-correction: 0.097904 a.u.  
 Lowest Frequency 40.4154 cm-1

---

**n3**

Atom Coordinates (x,y,z) in Angstrom

```
-----
Ru -0.652642 -0.014337 0.051505
Cl -0.390470 -2.259497 -0.719116
Cl -0.472131 2.306069 -0.483865
C 1.385860 0.023966 0.014941
C -0.608661 -0.107287 1.872977
N 2.207455 1.110418 0.079859
C 3.546346 0.750171 0.048560
C 3.571016 -0.624026 -0.022149
N 2.245935 -1.033286 -0.030476
H 1.785437 2.051187 0.039814
H 4.360238 1.481169 0.081153
H 4.410604 -1.324913 -0.063197
H 1.857749 -1.979457 -0.167680
H 0.324462 -0.121728 2.478268
H -1.552013 -0.154663 2.466096
C -2.852202 -0.747180 0.059837
C -2.876953 0.634626 0.130860
H -2.958498 -1.379158 0.956628
H -2.982230 -1.271822 -0.899800
H -3.027318 1.249867 -0.770212
H -3.004129 1.167105 1.087523
-----
```

Energy E(RB-P86) -1359.20070800 a.u.  
 -3568581.46 kJ/mol  
 -852911.36 kcal/mol

SCF Convergence: 0.3260D-08  
 Maximum Force: 0.000022  
 <S\*\*2>: 0.0000  
 Charge: 0.0000  
 ZPE-correction: 0.151153 a.u.  
 Lowest Frequency 62.5836 cm-1

---

**n4**

Atom Coordinates (x,y,z) in Angstrom

```
-----
Ru 0.020196 0.021623 0.688782
C 1.401949 -1.124305 0.941422
C -0.059144 -0.028503 -1.390370
Cl 1.586596 1.862827 0.292335
Cl -1.539209 -1.858108 0.501449
N -0.800785 -0.854646 -2.170297
N 0.581362 0.789961 -2.262552
C -0.631347 -0.569631 -3.511720
C 0.256539 0.486889 -3.570973
H 2.451449 -0.754005 0.975439
H 1.222410 -2.216783 1.059795
H -1.376724 -1.574739 -1.686954
H 1.215769 1.510589 -1.859825
C -0.100573 1.146872 2.602102
C -1.000734 0.074028 2.662831
H 0.885798 1.105409 3.089892
H -0.759858 -0.856050 3.200924
H -2.072885 0.219419 2.447860
-----
```

|   |           |           |           |
|---|-----------|-----------|-----------|
| H | -0.443433 | 2.161540  | 2.337930  |
| H | -1.144566 | -1.118901 | -4.307456 |
| H | 0.663656  | 1.032572  | -4.428163 |

---

Energy E(RB-P86) -1359.19594677 a.u.  
-3568568.96 kJ/mol  
-852908.37 kcal/mol

SCF Convergence: 0.7353D-08  
Maximum Force: 0.000014  
<S\*\*2>: 0.0000  
Charge: 0.0000  
ZPE-correction: 0.150801 a.u.  
Lowest Frequency 61.9211 cm-1

**(n4-n5)≠**

Atom Coordinates (x,y,z) in Angstrom

|    |           |           |           |
|----|-----------|-----------|-----------|
| Ru | -0.607375 | -0.045856 | 0.040779  |
| Cl | -0.388722 | -2.308436 | -0.764290 |
| Cl | -0.529068 | 2.310410  | 0.644156  |
| C  | 1.423085  | 0.105943  | -0.179740 |
| C  | -1.006972 | -0.491423 | 1.772031  |
| N  | 2.202445  | 1.199626  | 0.027128  |
| C  | 3.532563  | 0.927087  | -0.221231 |
| C  | 3.590190  | -0.401258 | -0.601600 |
| N  | 2.290451  | -0.867062 | -0.567230 |
| H  | 1.725843  | 2.070531  | 0.336202  |
| H  | 4.326117  | 1.674073  | -0.118003 |
| H  | 4.442812  | -1.025422 | -0.887557 |
| H  | 1.899533  | -1.799561 | -0.797139 |
| C  | -2.891956 | -0.538060 | 0.262423  |
| C  | -2.585834 | 0.437609  | -0.706454 |
| H  | -1.047685 | -1.556774 | 2.100145  |
| H  | -1.215346 | 0.285110  | 2.544155  |
| H  | -2.940906 | -1.607511 | 0.003390  |
| H  | -3.390534 | -0.229723 | 1.197057  |
| H  | -2.831975 | 1.500061  | -0.546625 |
| H  | -2.457661 | 0.105982  | -1.755474 |

---

Energy E(RB-P86) -1359.18788454 a.u.  
-3568547.79 kJ/mol  
-852903.31 kcal/mol

SCF Convergence: 0.6074D-08  
Maximum Force: 0.000035  
<S\*\*2>: 0.0000  
Charge: 0.0000  
ZPE-correction: 0.150211 a.u.  
Lowest Frequency -138.1378 cm-1

**n5**

Atom Coordinates (x,y,z) in Angstrom

|    |           |           |           |
|----|-----------|-----------|-----------|
| Ru | 0.566103  | 0.003254  | 0.036307  |
| Cl | 0.371183  | 2.410639  | 0.167640  |
| Cl | 0.546399  | -2.393869 | -0.106142 |
| C  | -1.453975 | -0.041582 | -0.094687 |
| C  | 1.896377  | 0.023444  | 1.485756  |
| N  | -2.249609 | -1.139263 | -0.208377 |
| C  | -3.580948 | -0.788805 | -0.274964 |
| C  | -3.620963 | 0.593760  | -0.201586 |
| N  | -2.312906 | 1.012373  | -0.091652 |
| H  | -1.788783 | -2.068845 | -0.230130 |
| H  | -4.389274 | -1.521425 | -0.368137 |
| H  | -4.471211 | 1.283107  | -0.219156 |



|   |           |           |           |
|---|-----------|-----------|-----------|
| H | -1.897742 | 1.962556  | -0.011578 |
| C | 2.808552  | 0.053023  | 0.181726  |
| C | 2.073529  | 0.191784  | -1.218215 |
| H | 1.958939  | 0.948451  | 2.092042  |
| H | 1.995283  | -0.920863 | 2.055706  |
| H | 3.431758  | 0.962644  | 0.286082  |
| H | 3.395728  | -0.883732 | 0.158785  |
| H | 2.254470  | -0.675624 | -1.881950 |
| H | 2.205590  | 1.183931  | -1.692611 |

-----  
Energy E(RB-P86) -1359.20613832 a.u.  
                  -3568595.72 kJ/mol  
                  -852914.76 kcal/mol

SCF Convergence: 0.5953D-08

Maximum Force: 0.000443

<S\*\*2>: 0.0000

Charge: 0.0000

ZPE-correction: 0.153191 a.u.

Lowest Frequency 59.5189 cm-1

---

**(n1-n6)≠**

Atom Coordinates (x,y,z) in Angstrom

-----  
Ru 0.032309 -0.033101 0.294297  
Cl 2.353817 0.127433 0.806861  
Cl -0.921194 0.076831 -2.086251  
C 0.004181 2.029572 0.196931  
C -0.221719 -0.425339 2.068236  
P 0.511036 -2.280593 -0.333631  
N -0.369580 2.776465 -0.876874  
C -0.146787 4.128383 -0.674362  
C 0.387050 4.244751 0.589038  
N 0.466039 2.951679 1.092095  
H -0.724505 2.266907 -1.711525  
H -0.377505 4.890183 -1.425528  
H 0.706910 5.125132 1.154997  
H 0.894495 2.669399 1.975918  
H -1.258131 -0.402693 2.485310  
H 0.569147 -0.733099 2.797222  
C 1.344479 -3.319617 0.945586  
C 1.684611 -2.318342 -1.753107  
C -0.900381 -3.328161 -0.905306  
C -3.246977 0.679793 0.652686  
C -3.445527 -0.648847 0.567486  
H -3.374877 -1.169240 -0.400852  
H -3.686990 -1.260617 1.453646  
H -3.318610 1.220506 1.611690  
H -3.013676 1.273850 -0.244306  
H -0.549061 -4.321503 -1.254226  
H -1.623986 -3.462757 -0.076649  
H -1.403861 -2.793638 -1.735361  
H 1.914530 -3.360638 -2.056647  
H 1.224223 -1.761996 -2.593039  
H 2.609771 -1.793761 -1.442882  
H 1.672264 -4.293084 0.526547  
H 2.221347 -2.755252 1.321301  
H 0.647973 -3.495048 1.789765

-----  
Energy E(RB-P86) -1820.12771554 a.u.  
                  -4778745.32 kJ/mol  
                  -1142147.43 kcal/mol

SCF Convergence: 0.3548D-08

Maximum Force: 0.000011

<S\*\*2>: 0.0000  
 Charge: 0.0000  
 ZPE-correction: 0.259151 a.u.  
 Lowest Frequency -101.5477 cm-1

**n6**

Atom Coordinates (x,y,z) in Angstrom

```
-----
Ru -0.265498 -0.035529 0.378554
Cl 2.181625 0.210685 0.313420
Cl -0.675025 0.202199 -2.192960
C -0.121764 2.035311 0.315005
C -0.087995 -0.308607 2.201356
P 0.364717 -2.296207 -0.306163
N -0.160480 2.767237 -0.822356
C 0.109461 4.105059 -0.582497
C 0.314488 4.223236 0.771488
N 0.156436 2.941371 1.293757
H -0.322613 2.241520 -1.713937
H 0.135465 4.856007 -1.378018
H 0.552608 5.091810 1.392859
H 0.304657 2.665582 2.265132
H -0.951515 -0.465070 2.898870
H 0.903818 -0.363731 2.711303
C 1.267842 -3.206449 1.023709
C 1.521332 -2.344601 -1.735660
C -0.945563 -3.494401 -0.823264
C -2.374440 0.529086 0.623688
C -2.301220 -0.865491 0.416028
H -2.551815 -1.264771 -0.579048
H -2.447584 -1.557179 1.264882
H -2.562689 0.934423 1.633125
H -2.673493 1.184765 -0.210329
H -0.482151 -4.458176 -1.118904
H -1.663481 -3.673146 0.000860
H -1.491812 -3.074610 -1.691094
H 1.788877 -3.395328 -1.971047
H 1.021969 -1.856611 -2.594999
H 2.418809 -1.753862 -1.471353
H 1.650235 -4.181488 0.658023
H 2.114199 -2.568488 1.347530
H 0.590968 -3.373390 1.885491
-----
```

Energy E(RB-P86) -1820.17031514 a.u.  
 -4778857.16 kJ/mol  
 -1142174.16 kcal/mol

SCF Convergence: 0.6188D-08  
 Maximum Force: 0.000036

<S\*\*2>: 0.0000  
 Charge: 0.0000  
 ZPE-correction: 0.262820 a.u.  
 Lowest Frequency 28.9240 cm-1

**(n6-n7)≠**

Atom Coordinates (x,y,z) in Angstrom

```
-----
Ru -0.246319 0.040011 0.315902
Cl 2.207808 0.118252 0.327621
Cl -0.066915 -0.051079 -2.289910
C -0.126387 2.077596 0.007762
C -0.072995 -0.045918 2.180953
P 0.144310 -2.373311 0.125164
N 0.033538 2.681974 -1.195254
C 0.234045 4.047013 -1.068619
-----
```

|   |           |           |           |
|---|-----------|-----------|-----------|
| C | 0.184303  | 4.324194  | 0.276472  |
| N | -0.045577 | 3.103414  | 0.907507  |
| H | 0.065993  | 2.055886  | -2.033096 |
| H | 0.393060  | 4.704776  | -1.928626 |
| H | 0.290207  | 5.265544  | 0.824238  |
| H | -0.080977 | 2.947944  | 1.915491  |
| H | -0.879499 | -0.056732 | 2.951223  |
| H | 0.949072  | -0.132626 | 2.614604  |
| C | 0.915367  | -3.098548 | 1.641892  |
| C | 1.337354  | -2.847720 | -1.192154 |
| C | -1.285751 | -3.511849 | -0.184828 |
| C | -2.368198 | 0.413690  | 0.905884  |
| C | -2.368732 | -0.238858 | -0.334085 |
| H | -2.487236 | 0.320545  | -1.273913 |
| H | -2.627587 | -1.305431 | -0.401700 |
| H | -2.623161 | -0.141365 | 1.824781  |
| H | -2.552875 | 1.499438  | 0.963213  |
| H | -0.941585 | -4.566601 | -0.207276 |
| H | -2.051414 | -3.400385 | 0.609424  |
| H | -1.746283 | -3.266137 | -1.162504 |
| H | 1.533426  | -3.939337 | -1.157903 |
| H | 0.928634  | -2.544310 | -2.174605 |
| H | 2.266821  | -2.271359 | -1.016409 |
| H | 1.186363  | -4.163455 | 1.488465  |
| H | 1.828713  | -2.510677 | 1.862606  |
| H | 0.216751  | -3.013829 | 2.498314  |

-----  
Energy E(RB-P86) -1820.15758862 a.u.  
-4778823.75 kJ/mol  
-1142166.18 kcal/mol

SCF Convergence: 0.3713D-08  
Maximum Force: 0.000002  
<S\*\*2>: 0.0000  
Charge: 0.0000  
ZPE-correction: 0.262865 a.u.  
Lowest Frequency -79.6424 cm-1

---

**n7**

Atom Coordinates (x,y,z) in Angstrom

-----  

|    |           |           |           |
|----|-----------|-----------|-----------|
| Ru | -0.242397 | -0.308879 | 0.042192  |
| Cl | 2.157619  | -0.790224 | 0.173278  |
| Cl | 0.483246  | 2.196143  | -0.133176 |
| C  | -0.112115 | -0.000948 | 2.079965  |
| C  | -0.414958 | -2.180296 | 0.052728  |
| P  | 0.023624  | -0.099144 | -2.361178 |
| N  | 0.290411  | 1.162494  | 2.650716  |
| C  | 0.411471  | 1.052979  | 4.026389  |
| C  | 0.055988  | -0.235159 | 4.346464  |
| N  | -0.266680 | -0.851268 | 3.138536  |
| H  | 0.525175  | 1.950332  | 2.005574  |
| H  | 0.735851  | 1.883363  | 4.661095  |
| H  | 0.006882  | -0.752528 | 5.309368  |
| H  | -0.524665 | -1.830966 | 3.017679  |
| H  | 0.516393  | -2.788345 | 0.091645  |
| H  | -1.343285 | -2.792284 | -0.018263 |
| C  | -0.150322 | -1.685509 | -3.302123 |
| C  | 1.669115  | 0.523939  | -2.893249 |
| C  | -1.157523 | 1.029994  | -3.227927 |
| C  | -2.163296 | 0.832132  | 0.097916  |
| C  | -2.455493 | -0.530588 | -0.057213 |
| H  | -2.761375 | -0.932813 | -1.038577 |
| H  | -2.804652 | -1.125141 | 0.803848  |

|   |           |           |           |
|---|-----------|-----------|-----------|
| H | -2.253098 | 1.319234  | 1.081857  |
| H | -2.197512 | 1.529445  | -0.751381 |
| H | -0.938567 | 1.067335  | -4.314891 |
| H | -2.202207 | 0.688584  | -3.081681 |
| H | -1.043941 | 2.043454  | -2.794021 |
| H | -0.002679 | -1.536030 | -4.391769 |
| H | 0.610645  | -2.396954 | -2.923532 |
| H | -1.154725 | -2.119681 | -3.124278 |
| H | 1.747365  | 0.527947  | -3.999923 |
| H | 1.793143  | 1.544502  | -2.481882 |
| H | 2.444347  | -0.120090 | -2.433841 |

---

Energy E(RB-P86) -1820.15946687 a.u.  
-4778828.68 kJ/mol  
-1142167.36 kcal/mol

SCF Convergence: 0.6728D-08

Maximum Force: 0.000003

<S\*\*2>: 0.0000

Charge: 0.0000

ZPE-correction: 0.262980 a.u.

Lowest Frequency 40.2238 cm<sup>-1</sup>

---

**(n7-n8)≠**

Atom Coordinates (x, y, z) in Angstrom

---

|    |           |           |           |
|----|-----------|-----------|-----------|
| Ru | -0.279750 | -0.011749 | 0.007333  |
| Cl | 2.011810  | -1.568435 | 0.368098  |
| Cl | 0.945238  | 2.050481  | -0.121507 |
| C  | -0.227320 | 0.245792  | 2.034231  |
| C  | -0.421007 | -1.923738 | 0.210144  |
| P  | 0.005547  | -0.068651 | -2.380804 |
| N  | -0.875284 | 1.122900  | 2.862089  |
| C  | -0.377671 | 1.079560  | 4.162065  |
| C  | 0.611052  | 0.124966  | 4.155793  |
| N  | 0.667064  | -0.369764 | 2.861361  |
| H  | -1.559880 | 1.793971  | 2.511309  |
| H  | -0.756974 | 1.716764  | 4.966910  |
| H  | 1.264873  | -0.230091 | 4.958530  |
| H  | 1.371932  | -1.001276 | 2.426886  |
| H  | -0.380151 | -2.654289 | -0.624284 |
| C  | -0.727595 | -1.474048 | -3.354928 |
| C  | 1.777279  | -0.109524 | -2.896814 |
| C  | -0.644542 | 1.411071  | -3.285464 |
| C  | -2.284709 | 0.449605  | -0.088782 |
| C  | -2.200943 | -1.034948 | 0.026979  |
| H  | -2.521910 | -1.613104 | -0.858768 |
| H  | -2.585235 | -1.458377 | 0.973700  |
| H  | -2.665606 | 0.855841  | -1.044616 |
| H  | -0.380612 | 1.383506  | -4.362927 |
| H  | -1.747279 | 1.467844  | -3.183630 |
| H  | -0.202130 | 2.308792  | -2.809146 |
| H  | 1.884510  | -0.105700 | -4.001315 |
| H  | 2.270550  | 0.780251  | -2.458000 |
| H  | 2.255329  | -1.008053 | -2.459332 |
| H  | -0.501051 | -1.377043 | -4.436725 |
| H  | -0.312067 | -2.437011 | -2.994111 |
| H  | -1.829416 | -1.497142 | -3.226407 |
| H  | -0.488263 | -2.431840 | 1.195608  |
| H  | -2.730395 | 0.974523  | 0.780183  |

---

Energy E(RB-P86) -1820.14338194 a.u.  
-4778786.45 kJ/mol  
-1142157.26 kcal/mol

SCF Convergence: 0.2780D-08  
 Maximum Force: 0.000022  
 <S\*\*2>: 0.0000  
 Charge: 0.0000  
 ZPE-correction: 0.262463 a.u.  
 Lowest Frequency -281.6267 cm-1

**n8**

/home/heiko/PHC/PMe3

Atom Coordinates (x,y,z) in Angstrom

```
-----
Ru -0.281532 -0.037039 0.013722
Cl 2.135841 -1.054701 0.234366
Cl 0.881425 2.043535 -0.076459
C -0.220222 0.180193 2.056810
C -0.709894 -1.992595 0.184619
P 0.012304 -0.089058 -2.377533
N -1.012771 0.836787 2.960700
C -0.454349 0.835352 4.236989
C 0.726991 0.139349 4.128368
N 0.830992 -0.251314 2.804623
H -1.859124 1.337970 2.687917
H -0.929962 1.318731 5.096057
H 1.484382 -0.099574 4.881661
H 1.619917 -0.703607 2.280047
H -0.533382 -2.473024 1.164678
H -0.486029 -2.672047 -0.656869
C -0.293435 -1.689468 -3.272579
C 1.717156 0.339026 -2.933297
C -1.035915 1.102320 -3.337649
C -2.230404 0.347042 -0.049698
C -2.111439 -1.279481 0.072541
H -2.615612 -1.678359 -0.828487
H -2.658981 -1.523790 1.003739
H -2.781270 0.752924 0.825737
H -2.752147 0.634866 -0.984028
H -0.755878 1.123463 -4.411152
H -2.107411 0.828697 -3.254645
H -0.896764 2.110825 -2.898852
H 1.797999 0.312336 -4.039425
H 1.957452 1.348626 -2.546480
H 2.422610 -0.374811 -2.464002
H -0.133570 -1.576280 -4.364729
H 0.409227 -2.455708 -2.887043
H -1.330620 -2.044536 -3.103200
-----
```

Energy E(RB-P86) -1820.15303657 a.u.  
 -4778811.80 kJ/mol  
 -1142163.32 kcal/mol

SCF Convergence: 0.2344D-08  
 Maximum Force: 0.000018  
 <S\*\*2>: 0.0000  
 Charge: 0.0000  
 ZPE-correction: 0.263903 a.u.  
 Lowest Frequency 19.4876 cm-1

**(n1-n9)#**

Atom Coordinates (x,y,z) in Angstrom

```
-----
Ru 0.053419 -0.121396 -0.190951
C -1.975522 -0.063136 -0.042382
C 0.033807 0.877084 1.370059
Cl -0.017883 -2.391532 0.604955
Cl -0.085376 1.564557 -1.904805
-----
```

|   |           |           |           |
|---|-----------|-----------|-----------|
| P | 2.475377  | 0.035488  | -0.005523 |
| N | -2.790697 | -0.913675 | 0.645255  |
| C | -4.117163 | -0.500357 | 0.613473  |
| C | -4.136659 | 0.666147  | -0.116213 |
| N | -2.821154 | 0.907318  | -0.493728 |
| H | -2.384727 | -1.765351 | 1.059270  |
| H | -4.927053 | -1.051983 | 1.101103  |
| H | -4.966899 | 1.326065  | -0.386778 |
| H | -2.441966 | 1.659664  | -1.086830 |
| H | -0.899830 | 1.201119  | 1.885296  |
| H | 0.936670  | 1.253233  | 1.903484  |
| C | 3.109073  | -0.658375 | 1.593818  |
| C | 3.068883  | 1.792523  | 0.016866  |
| C | 3.697333  | -0.710690 | -1.191335 |
| H | 4.165351  | 1.856316  | 0.173834  |
| H | 2.794887  | 2.258999  | -0.950674 |
| H | 2.552136  | 2.358831  | 0.816897  |
| H | 4.739549  | -0.486237 | -0.882008 |
| H | 3.561920  | -1.814054 | -1.224899 |
| H | 3.531386  | -0.297457 | -2.210469 |
| H | 4.204508  | -0.517355 | 1.699184  |
| H | 2.595228  | -0.176788 | 2.449272  |
| H | 2.860632  | -1.738358 | 1.620898  |
| C | 0.656566  | -1.720278 | -2.721700 |
| C | -0.683315 | -1.581803 | -2.554626 |
| H | -1.238658 | -0.803725 | -3.101207 |
| H | -1.255192 | -2.330132 | -1.984807 |
| H | 1.190423  | -2.594997 | -2.312065 |
| H | 1.204106  | -1.058988 | -3.413763 |

-----  
 Energy E(RB-P86) -1820.15027128 a.u.  
                   -4778804.54 kJ/mol  
                   -1142161.59 kcal/mol

SCF Convergence: 0.2468D-08  
 Maximum Force: 0.005006  
 <S\*\*2>: 0.0000  
 Charge: 0.0000  
 ZPE-correction: 0.260308 a.u.  
 Lowest Frequency -102.0138 cm-1

---

**n9**

Atom Coordinates (x, y, z) in Angstrom

|    |           |           |           |
|----|-----------|-----------|-----------|
| Ru | -0.016279 | 0.018223  | 0.044735  |
| Cl | -0.190183 | 2.178480  | -1.091960 |
| Cl | -0.051151 | -2.312076 | 0.790132  |
| C  | -2.052932 | 0.030326  | 0.224445  |
| C  | -0.063858 | 0.745075  | 1.777622  |
| P  | 2.404269  | 0.130741  | 0.135800  |
| N  | -2.849741 | -0.937716 | 0.754286  |
| C  | -4.184827 | -0.550318 | 0.776987  |
| C  | -4.224055 | 0.718249  | 0.245462  |
| N  | -2.910999 | 1.043424  | -0.075760 |
| H  | -2.415784 | -1.825643 | 1.052212  |
| H  | -4.985349 | -1.189453 | 1.162413  |
| H  | -5.065370 | 1.398040  | 0.078261  |
| H  | -2.530969 | 1.899864  | -0.508887 |
| H  | -1.004833 | 0.951011  | 2.336596  |
| H  | 0.818086  | 1.029973  | 2.387782  |
| C  | 3.146529  | 0.809284  | 1.701188  |
| C  | 3.251833  | 1.204200  | -1.116326 |
| C  | 3.333765  | -1.468294 | 0.003260  |
| H  | 4.332054  | 1.312891  | -0.887885 |

|   |           |           |           |
|---|-----------|-----------|-----------|
| H | 3.141110  | 0.764626  | -2.126729 |
| H | 2.759218  | 2.196993  | -1.122662 |
| H | 4.413005  | -1.325248 | 0.216919  |
| H | 2.894127  | -2.193347 | 0.716954  |
| H | 3.222006  | -1.886185 | -1.016187 |
| H | 4.252705  | 0.809594  | 1.622580  |
| H | 2.802088  | 1.848751  | 1.873834  |
| H | 2.851941  | 0.187376  | 2.570316  |
| C | 0.591332  | -0.866222 | -2.113220 |
| C | -0.790728 | -0.874862 | -2.030380 |
| H | -1.381155 | -0.060832 | -2.477611 |
| H | -1.326833 | -1.794788 | -1.751812 |
| H | 1.158093  | -1.789448 | -1.918282 |
| H | 1.103607  | -0.050562 | -2.645982 |

-----  
Energy E (RB-P86) -1820.16221738 a.u.  
-4778835.90 kJ/mol  
-1142169.08 kcal/mol

SCF Convergence: 0.2568D-08

Maximum Force: 0.000005

<S\*\*2>: 0.0000

Charge: 0.0000

ZPE-correction: 0.262130 a.u.

Lowest Frequency 36.3578 cm-1

---

**n1a**

Atom Coordinates (x,y,z) in Angstrom

|    |           |           |           |
|----|-----------|-----------|-----------|
| Ru | 0.537190  | 0.002397  | 0.069551  |
| Cl | 0.453746  | 2.276717  | -0.582227 |
| Cl | 0.463996  | -2.272209 | -0.582557 |
| C  | -1.492223 | -0.002144 | 0.062067  |
| C  | 0.567817  | 0.002312  | 1.902894  |
| P  | 2.917685  | 0.007077  | -0.018110 |
| N  | -2.331621 | -1.078125 | 0.043549  |
| C  | -3.663819 | -0.695681 | -0.010687 |
| C  | -3.666950 | 0.681446  | -0.011103 |
| N  | -2.336512 | 1.069981  | 0.042875  |
| H  | -1.928536 | -2.023257 | -0.029662 |
| H  | -4.490469 | -1.412447 | -0.039534 |
| H  | -4.496855 | 1.394426  | -0.040377 |
| H  | -1.937669 | 2.016890  | -0.030758 |
| H  | -0.358629 | 0.000392  | 2.519613  |
| H  | 1.512052  | 0.004162  | 2.495070  |
| H  | 3.640973  | 0.007560  | 1.226488  |
| H  | 3.627365  | 1.089658  | -0.636135 |
| H  | 3.630692  | -1.072895 | -0.636888 |

Energy E(RB-P86) -1623.75409594 a.u.  
-4263166.38 kJ/mol  
-1018921.12 kcal/mol

SCF Convergence: 0.4068D-08

Maximum Force: 0.000055

&lt;S\*\*2&gt;: 0.0000

Charge: 0.0000

ZPE-correction: 0.124994 a.u.

Lowest Frequency 59.2601 cm-1



**C2H4**

Atom Coordinates (x,y,z) in Angstrom

```

-----
C   -0.671063   0.000028  -0.000001
C    0.671063  -0.000028   0.000002
H    1.251676   0.938111   0.000008
H    1.251600  -0.938213  -0.000007
H   -1.251675  -0.938111  -0.000011
H   -1.251601   0.938213   0.000004
-----

```

```

Energy E(RB-P86)   -78.52443283 a.u.
                   -206165.90 kJ/mol
                   -49274.83 kcal/mol

```

SCF Convergence: 0.1784D-10

Maximum Force: 0.000061

&lt;S\*\*2&gt;: 0.0000

Charge: 0.0000

ZPE-correction: 0.049270 a.u.

Lowest Frequency 795.3789 cm-1

**PMe3**

Atom Coordinates (x,y,z) in Angstrom

```

-----
P   -0.316989  -0.348204   0.384496
C    1.552056  -0.421766   0.448067
C   -0.547451   1.507071   0.470081
C   -0.563548  -0.600498  -1.453248
H    1.888258  -1.456865   0.230656
H    2.036747   0.270394  -0.274848
H    1.897094  -0.167413   1.471745
H   -1.616500   1.754552   0.303777
H   -0.277251   1.864272   1.485557
H    0.067322   2.055641  -0.276649
H   -1.630950  -0.434468  -1.707826
H    0.061950   0.078568  -2.073105
H   -0.318164  -1.650461  -1.716145
-----

```

```

Energy E(RB-P86)   -460.93013297 a.u.
                   -1210172.06 kJ/mol
                   -289238.04 kcal/mol

```

SCF Convergence: 0.6669D-09

Maximum Force: 0.000148

&lt;S\*\*2&gt;: 0.0000

Charge: 0.0000

ZPE-correction: 0.108612 a.u.

Lowest Frequency 172.3156 cm-1

**PH3**

Atom Coordinates (x,y,z) in Angstrom

```

-----
P   -0.096104  -0.001591   0.092380
H    0.176312  -1.102744  -0.797402
H    1.302647   0.171275   0.396136
H   -0.037394   0.955322  -0.984433
-----

```

```

Energy E(RB-P86)   -343.06911365 a.u.
                   -900727.96 kJ/mol
                   -215279.13 kcal/mol

```

SCF Convergence: 0.1931D-08

Maximum Force: 0.000043

&lt;S\*\*2&gt;: 0.0000

Charge: 0.0000

ZPE-correction: 0.023044 a.u.

Lowest Frequency 985.6905 cm-1

**PH**

Atom Coordinates (x, y, z) in Angstrom

```

-----
C   -0.969148   -1.086492   -0.119894
P    0.756448   -1.138502   -0.123319
C    1.394989    0.566103   -0.051521
C    0.385442    1.431464    0.271779
P   -1.227284    0.609710    0.065261
H    1.369442   -1.888429   -1.171464
H    0.521418    2.506422    0.473413
H   -2.157736    1.008861    1.071012
H    2.461723    0.838572   -0.104279
-----

```

```

Energy E(RB-P86)   -799.07453048 a.u.
                   -2097970.18 kJ/mol
                   -501426.86 kcal/mol

```

SCF Convergence: 0.5518D-08

Maximum Force: 0.000198

&lt;S\*\*2&gt;: 0.0000

Charge: 0.0000

ZPE-correction: 0.053243 a.u.

Lowest Frequency 211.1099 cm<sup>-1</sup>**PPh**

Atom Coordinates (x, y, z) in Angstrom

```

-----
C   -0.532948   -0.598044   -0.065740
P    1.171096   -0.622048   -0.246886
C    1.810748    1.058724   -0.073268
C    0.821931    1.888452    0.403033
P   -0.779280    1.058405    0.297536
C    1.932601   -1.649203   -1.533956
H    0.980908    2.942455    0.680263
C   -2.026134    1.544143    1.522499
H    2.862348    1.360835   -0.199473
C   -2.919975    0.568824    2.022486
C   -3.929850    0.943881    2.922887
C   -4.056573    2.283148    3.334616
C   -2.163188    2.892792    1.925765
C   -3.169802    3.254367    2.835380
H   -2.804615   -0.478864    1.703039
H   -4.619671    0.178555    3.313054
H   -4.847198    2.571000    4.045435
H   -1.484261    3.665409    1.530391
H   -3.264744    4.305266    3.152056
C    1.130972   -2.571072   -2.246484
C    1.719696   -3.416295   -3.200565
C    3.101589   -3.349923   -3.455839
C    3.324057   -1.593128   -1.780851
C    3.900103   -2.435354   -2.745337
H    0.048301   -2.606645   -2.047590
H    1.089046   -4.128549   -3.756250
H    3.557437   -4.011503   -4.209315
H    3.962626   -0.891554   -1.220287
H    4.983222   -2.379641   -2.938822
-----

```

```

Energy E(RB-P86)   -1260.85681030 a.u.
                   -3310379.56 kJ/mol
                   -791199.63 kcal/mol

```

SCF Convergence: 0.4957D-08

Maximum Force: 0.000006

&lt;S\*\*2&gt;: 0.0000

Charge: 0.0000

ZPE-correction: 0.214445 a.u.  
 Lowest Frequency 21.3342 cm<sup>-1</sup>

**PNH**

Atom Coordinates (x,y,z) in Angstrom

```
-----
C   -0.823551  -1.183711  -0.040983
P    0.839809  -0.982554   0.404406
N    1.350088   0.699490   0.120344
C    0.300970   1.435427  -0.059134
P   -1.236513   0.439795  -0.390067
H    1.740984  -1.766348  -0.379359
H    0.369490   2.535186  -0.168206
H   -2.475039   0.965827   0.090763
-----
```

Energy E(RB-P86) -815.11325586 a.u.  
 -2140079.85 kJ/mol  
 -511491.31 kcal/mol

SCF Convergence: 0.3079D-08

Maximum Force: 0.000046

<S\*\*2>: 0.0000

Charge: 0.0000

ZPE-correction: 0.041916 a.u.

Lowest Frequency 227.4164 cm<sup>-1</sup>

**IH**

Atom Coordinates (x,y,z) in Angstrom

```
-----
C    0.809912  -1.001231   0.000000
N    1.074003   0.348960   0.000000
C   -0.058739   1.163815   0.000000
C   -1.125870   0.300602   0.000000
N   -0.565619  -0.977391   0.000000
H    2.030668   0.704158   0.000000
H   -0.024494   2.258740   0.000000
H   -2.203812   0.495740   0.000000
H   -1.112867  -1.838735   0.000000
-----
```

Energy E(RB-P86) -226.01754042 a.u.  
 -593409.05 kJ/mol  
 -141828.15 kcal/mol

SCF Convergence: 0.4843D-08

Maximum Force: 0.000188

<S\*\*2>: 0.0000

Charge: 0.0000

ZPE-correction: 0.069391 a.u.

Lowest Frequency 583.4301 cm<sup>-1</sup>

**RuCl2CH2PMe3**

Atom Coordinates (x,y,z) in Angstrom

```
-----
Ru  -0.807648  -0.024633   0.158182
Cl  -1.094183   2.249001  -0.185522
Cl  -1.111450  -2.042656  -0.939510
C   -0.822514  -0.338760   1.947735
P    1.388545   0.002152  -0.043503
H   -1.838069  -0.416171   2.411017
H    0.030182  -0.465596   2.651610
C    2.235850  -1.566897   0.428709
C    2.247257   1.309599   0.934297
C    1.927941   0.305605  -1.781977
H    3.342512   1.281259   0.757368
H    1.836131   2.294507   0.638030
H    2.043622   1.159227   2.012831
H    3.035524   0.313634  -1.854933
-----
```

|   |          |           |           |
|---|----------|-----------|-----------|
| H | 1.517155 | -0.493023 | -2.431064 |
| H | 1.524811 | 1.281184  | -2.119006 |
| H | 3.331387 | -1.488757 | 0.269408  |
| H | 2.032967 | -1.791115 | 1.494489  |
| H | 1.816671 | -2.388724 | -0.184250 |

---

Energy E(RB-P86) -1515.53274016 a.u.  
-3979031.21 kJ/mol  
-951011.19 kcal/mol

SCF Convergence: 0.1941D-08  
Maximum Force: 0.000015  
<S\*\*2>: 0.0000  
Charge: 0.0000  
ZPE-correction: 0.137357 a.u.  
Lowest Frequency 40.4386 cm-1

**RuCl2CH2PH3**

Atom Coordinates (x,y,z) in Angstrom

|    |           |           |           |
|----|-----------|-----------|-----------|
| Ru | -0.295225 | -0.026689 | 0.110561  |
| P  | 1.877085  | -0.081736 | -0.080135 |
| C  | -0.272530 | -0.708056 | 1.795231  |
| Cl | -0.723635 | -1.744899 | -1.360540 |
| Cl | -0.480340 | 2.263203  | 0.257754  |
| H  | 2.444754  | -0.886055 | -1.121479 |
| H  | 2.568769  | 1.154687  | -0.295729 |
| H  | 2.607175  | -0.583519 | 1.050479  |
| H  | 0.596720  | -1.013767 | 2.419624  |
| H  | -1.281037 | -0.833819 | 2.260433  |

---

Energy E(RB-P86) -1397.64724561 a.u.  
-3669522.84 kJ/mol  
-877036.92 kcal/mol

SCF Convergence: 0.4752D-09  
Maximum Force: 0.000040  
<S\*\*2>: 0.0000  
Charge: 0.0000  
ZPE-correction: 0.053561 a.u.  
Lowest Frequency 98.1421 cm-1

---

**n3-ii**

```

-----
Ru   0.017234   0.034447   0.653607
C    1.215409  -1.333966   0.795492
C    0.044671  -0.165992  -1.375430
Cl   -2.130142  -0.998110   0.491849
Cl    1.318150   1.994615   0.242738
N    -0.737240  -0.969660  -2.151501
N     0.882113   0.435119  -2.268243
C    -0.420358  -0.857838  -3.497037
C     0.617716   0.042649  -3.571858
H     1.581629  -1.672437   1.793127
H     1.636964  -1.891238  -0.070000
H    -1.518284  -1.476428  -1.706576
H     1.526399   1.164854  -1.925933
C     0.512079   0.701734   2.818376
C    -0.531542  -0.203931   2.893768
H     0.327671   1.787486   2.831788
H     1.557789   0.402467   2.996730
H    -0.365272  -1.266337   3.135741
H    -1.576821   0.134786   2.969427
H    -0.943105  -1.416115  -4.279913
H     1.176648   0.422554  -4.432732
-----

```

```

Energy E (RB-P86)  -1359.20070799 a.u.
                   -3568581.46 kJ/mol
                   -852911.36 kcal/mol

```

SCF Convergence: 0.7350D-08

Maximum Force: 0.000038

<S\*\*2>: 0.0000

Charge: 0.0000

ZPE-correction: 0.151151 a.u.

Lowest Frequency 62.6975 cm-1

**n3-ia**

no local minimum

**n3-ai**

Atom Coordinates (x,y,z) in Angstrom

```

-----
Ru   0.020196   0.021623   0.688782
C    1.401949  -1.124305   0.941422
C    -0.059144  -0.028503  -1.390370
Cl   1.586596   1.862827   0.292335
Cl  -1.539209  -1.858108   0.501449
N    -0.800785  -0.854646  -2.170297
N     0.581362   0.789961  -2.262552
C    -0.631347  -0.569631  -3.511720
C     0.256539   0.486889  -3.570973
H     2.451449  -0.754005   0.975439
H     1.222410  -2.216783   1.059795
H    -1.376724  -1.574739  -1.686954
H     1.215769   1.510589  -1.859825
C    -0.100573   1.146872   2.602102
C    -1.000734   0.074028   2.662831
H     0.885798   1.105409   3.089892
H    -0.759858  -0.856050   3.200924
H    -2.072885   0.219419   2.447860
H    -0.443433   2.161540   2.337930
H    -1.144566  -1.118901  -4.307456
H     0.663656   1.032572  -4.428163
-----

```

```

Energy E (RB-P86)  -1359.19594677 a.u.
                   -3568568.96 kJ/mol

```

-852908.37 kcal/mol  
 SCF Convergence: 0.7353D-08  
 Maximum Force: 0.000014  
 <S\*\*2>: 0.0000  
 Charge: 0.0000  
 ZPE-correction: 0.150801 a.u.  
 Lowest Frequency 61.9211 cm-1

**n3-aa**

no local minimum

**p3ii/p3ia**

Atom Coordinates (x,y,z) in Angstrom

|    |           |           |           |
|----|-----------|-----------|-----------|
| Ru | 0.121432  | -0.888798 | 0.002882  |
| C  | 1.959241  | -0.846814 | -0.027493 |
| C  | 0.032131  | 1.050718  | -0.046097 |
| Cl | -0.460122 | -0.881283 | -2.280538 |
| Cl | -0.499086 | -0.829721 | 2.267724  |
| H  | 2.563493  | -1.774669 | 0.041159  |
| H  | 2.541794  | 0.093514  | -0.134834 |
| C  | 0.458286  | -3.299925 | 0.479048  |
| C  | -0.759924 | -3.136971 | -0.129828 |
| H  | 0.566939  | -3.280916 | 1.574139  |
| H  | 1.334976  | -3.611904 | -0.112142 |
| H  | -0.893780 | -3.318577 | -1.206654 |
| H  | -1.676349 | -2.989929 | 0.467794  |
| P  | -0.659416 | 2.048163  | -1.363932 |
| P  | 0.554627  | 2.133321  | 1.267548  |
| C  | -0.533310 | 3.699478  | -0.597635 |
| C  | 0.272271  | 3.756537  | 0.498654  |
| H  | -2.057666 | 1.781010  | -1.505653 |
| H  | 1.965628  | 1.945800  | 1.448493  |
| H  | 0.561081  | 4.694958  | 1.000867  |
| H  | -0.942895 | 4.594498  | -1.096279 |

Energy E(RB-P86) -1932.24785654 a.u.  
 -5073116.75 kJ/mol  
 -1212503.89 kcal/mol

SCF Convergence: 0.4564D-08  
 Maximum Force: 0.000061  
 <S\*\*2>: 0.0000  
 Charge: 0.0000  
 ZPE-correction: 0.134405 a.u.  
 Lowest Frequency 36.6993 cm-1

**p3-ai**

Atom Coordinates (x,y,z) in Angstrom

|    |           |           |           |
|----|-----------|-----------|-----------|
| Ru | 0.246261  | -0.879225 | 0.089229  |
| C  | 2.041397  | -1.024373 | 0.387730  |
| C  | -0.039451 | 1.025907  | 0.043130  |
| Cl | -0.184967 | -0.875568 | 2.468338  |
| Cl | 0.876818  | -0.605605 | -2.279987 |
| H  | 2.397795  | -1.351200 | 1.387310  |
| H  | 2.777987  | -0.841491 | -0.420914 |
| C  | -0.933829 | -2.838669 | 0.385090  |
| C  | -0.642683 | -2.756296 | -0.967727 |
| H  | -0.312425 | -3.433037 | 1.073778  |
| H  | 0.222163  | -3.276684 | -1.407073 |
| H  | -1.366764 | -2.347556 | -1.690723 |
| H  | -1.904413 | -2.508385 | 0.789725  |
| P  | -1.723359 | 1.494397  | 0.486313  |
| P  | 0.937540  | 2.386448  | -0.565845 |
| C  | -1.573950 | 3.258064  | 0.004723  |

|   |           |          |           |
|---|-----------|----------|-----------|
| C | -0.432061 | 3.602366 | -0.646487 |
| H | -1.601691 | 1.400202 | 1.921709  |
| H | 1.156656  | 1.850311 | -1.892148 |
| H | -0.268497 | 4.611852 | -1.061762 |
| H | -2.426994 | 3.947182 | 0.126273  |

---

Energy E (RB-P86) -1932.23581914 a.u.  
-5073085.14 kJ/mol  
-1212496.33 kcal/mol

SCF Convergence: 0.8122D-08  
Maximum Force: 0.000009  
<S\*\*2>: 0.0000  
Charge: 0.0000  
ZPE-correction: 0.133590 a.u.  
Lowest Frequency 42.2770 cm-1

---

**p3-aa**

no local minimum

---

**n3-ii**

Atom Coordinates (x,y,z) in Angstrom

```

-----
Ru   0.018821   0.030292   0.627944
C    1.212928  -1.327625   0.780183
C    0.047839  -0.170581  -1.399638
Cl   -2.135101  -1.012414   0.513476
Cl   1.325928   2.004870   0.264422
N    -0.731025  -0.966537  -2.168002
N     0.875658   0.432950  -2.283405
C    -0.415981  -0.852353  -3.509226
C     0.611519   0.042557  -3.583024
H     1.573362  -1.658880   1.771108
H     1.638968  -1.887325  -0.069526
H    -1.498797  -1.484472  -1.738952
H     1.524978   1.149276  -1.956180
C     0.495683   0.708585   2.897393
C    -0.530015  -0.184020   2.971095
H     0.313860   1.784845   2.871500
H     1.537667   0.409683   3.034110
H    -0.364149  -1.245314   3.170828
H    -1.570443   0.145090   3.006940
H    -0.935388  -1.404922  -4.286876
H     1.163501   0.423135  -4.437617
-----

```

```

Energy E(RB+HF-LYP)  -1359.03615499 a.u.
                    -3568149.42 kJ/mol
                    -852808.10 kcal/mol

```

SCF Convergence: 0.1911D-08

Maximum Force: 0.000025

&lt;S\*\*2&gt;: 0.0000

Charge: 0.0000

ZPE-correction: 0.155733 a.u.

Lowest Frequency 59.9390 cm-1

**n3-ia**

Atom Coordinates (x,y,z) in Angstrom

```

-----
Ru   0.015799   0.030053  -0.588344
C    0.720695   1.712951  -0.667895
C    0.055795   0.151129   1.420464
Cl   -2.337575   0.383953  -0.517245
Cl   1.918304  -1.398323  -0.494521
N    -0.916569   0.605248   2.245873
N     1.053736  -0.219890   2.256724
C    -0.548081   0.505106   3.574142
C     0.711427  -0.022333   3.581091
H     0.940326   2.225339  -1.618641
H     0.965193   2.308783   0.228275
H    -1.815359   0.892681   1.858466
H     1.892783  -0.660160   1.878974
C    -0.401289  -0.993888  -2.782096
C     0.112388   0.228877  -3.065226
H     0.243046  -1.874715  -2.720635
H    -1.481544  -1.152323  -2.729681
H    -0.540603   1.085651  -3.248973
H     1.182692   0.363788  -3.239850
H     1.374670  -0.265776   4.406143
H    -1.194551   0.810129   4.392008
-----

```

```

Energy E(RB+HF-LYP)  -1359.03531168 a.u.
                    -3568147.21 kJ/mol
                    -852807.57 kcal/mol

```



SCF Convergence: 0.4752D-08  
 Maximum Force: 0.000033  
 <S\*\*2>: 0.0000  
 Charge: 0.0000  
 ZPE-correction: 0.155297 a.u.  
 Lowest Frequency 24.8790 cm<sup>-1</sup>

**n3-ai**

Atom Coordinates (x,y,z) in Angstrom

```
-----
Ru  0.013002  0.023290  0.674800
C   1.389093 -1.126699  0.890822
C   -0.043218 -0.035144 -1.411138
Cl  1.560761  1.897918  0.319223
Cl  -1.587656 -1.833348  0.508524
N   -0.770220 -0.859610 -2.190629
N    0.605820  0.771758 -2.273456
C   -0.582514 -0.583670 -3.527734
C    0.299264  0.461761 -3.580804
H    2.432635 -0.768827  0.919028
H    1.214900 -2.211551  0.993829
H   -1.357964 -1.569982 -1.738666
H    1.227694  1.495613 -1.894537
C   -0.077820  1.105026  2.677957
C   -0.966326  0.050712  2.731905
H    0.924371  1.039374  3.106057
H   -0.708806 -0.898851  3.205204
H   -2.030938  0.194993  2.528461
H   -0.411943  2.116243  2.430043
H   -1.081112 -1.133773 -4.320782
H    0.716204  0.997380 -4.428987
-----
```

Energy E(RB+HF-LYP) -1359.03143496 a.u.  
 -3568137.03 kJ/mol  
 -852805.14 kcal/mol

SCF Convergence: 0.3271D-08  
 Maximum Force: 0.000042  
 <S\*\*2>: 0.0000  
 Charge: 0.0000  
 ZPE-correction: 0.155636 a.u.  
 Lowest Frequency 62.9814 cm<sup>-1</sup>

**n3-aa**

no local minimum

**p3-ii**

Atom Coordinates (x,y,z) in Angstrom

```
-----
Ru  0.058256 -0.869109  0.018421
C   1.818082 -0.908703 -0.436081
C   0.000451  1.075988 -0.068226
Cl  -1.150103 -0.899476 -2.018480
Cl  -0.057614 -0.730244  2.373420
H    2.333633 -1.879811 -0.527585
H    2.440684 -0.026220 -0.651505
C    0.331604 -3.387123  0.764075
C   -0.171021 -3.420540 -0.487632
H   -0.315592 -3.412552  1.642193
H    1.405999 -3.413255  0.962344
H    0.468556 -3.478489 -1.371599
H   -1.245768 -3.483474 -0.672031
P   -0.712843  2.097389 -1.348843
P    0.719663  2.131236  1.159864
C   -0.378710  3.742346 -0.643566
C    0.505408  3.753278  0.375811
-----
```

|   |           |          |           |
|---|-----------|----------|-----------|
| H | -2.119013 | 1.933438 | -1.358473 |
| H | 2.103516  | 1.827692 | 1.245459  |
| H | 0.905590  | 4.666880 | 0.825583  |
| H | -0.746867 | 4.650949 | -1.130490 |

---

Energy E(RB+HF-LYP) -1932.04021151 a.u.  
-5072571.58 kJ/mol  
-1212373.59 kcal/mol

SCF Convergence: 0.3740D-08

Maximum Force: 0.000030

<S\*\*2>: 0.0000

Charge: 0.0000

ZPE-correction: 0.138247 a.u.

Lowest Frequency 36.7930 cm-1

---

**p3-ia**

Atom Coordinates (x,y,z) in Angstrom

---

|    |           |           |           |
|----|-----------|-----------|-----------|
| Ru | 0.072442  | -0.835962 | -0.005895 |
| C  | 1.867567  | -0.943600 | -0.298686 |
| C  | 0.095706  | 1.087556  | -0.056002 |
| Cl | -0.890014 | -0.907977 | -2.154501 |
| Cl | -0.176135 | -0.839743 | 2.330646  |
| H  | 2.371638  | -1.922671 | -0.330531 |
| H  | 2.526275  | -0.076492 | -0.467791 |
| C  | -1.040358 | -3.265833 | 0.159843  |
| C  | 0.282396  | -3.516826 | 0.205988  |
| H  | -1.613077 | -3.093262 | 1.074999  |
| H  | -1.589857 | -3.284746 | -0.784021 |
| H  | 0.839943  | -3.754979 | -0.704478 |
| H  | 0.823007  | -3.554085 | 1.155113  |
| P  | -0.742924 | 2.125054  | -1.251441 |
| P  | 0.916833  | 2.128007  | 1.134772  |
| C  | -0.374736 | 3.757281  | -0.531793 |
| C  | 0.598834  | 3.759644  | 0.402355  |
| H  | -2.140781 | 1.925392  | -1.117306 |
| H  | 2.306757  | 1.845133  | 1.027940  |
| H  | 1.024274  | 4.671943  | 0.831422  |
| H  | -0.796164 | 4.672075  | -0.960635 |

---

Energy E(RB+HF-LYP) -1932.04159883 a.u.  
-5072575.22 kJ/mol  
-1212374.46 kcal/mol

SCF Convergence: 0.2851D-08

Maximum Force: 0.000014

<S\*\*2>: 0.0000

Charge: 0.0000

ZPE-correction: 0.137703 a.u.

Lowest Frequency 33.0572 cm-1

---

**p3-ai**

Atom Coordinates (x,y,z) in Angstrom

---

|    |           |           |           |
|----|-----------|-----------|-----------|
| Ru | 0.209713  | -0.840692 | 0.080439  |
| C  | 2.004646  | -0.923609 | 0.331211  |
| C  | -0.038389 | 1.049648  | 0.040730  |
| Cl | -0.243293 | -0.908109 | 2.451630  |
| Cl | 0.652112  | -0.667667 | -2.325618 |
| H  | 2.416391  | -1.204222 | 1.315041  |
| H  | 2.714119  | -0.730401 | -0.488876 |
| C  | -0.786869 | -3.104402 | 0.440016  |
| C  | -0.504373 | -3.056214 | -0.886371 |
| H  | -0.084331 | -3.520024 | 1.165520  |
| H  | 0.439582  | -3.427146 | -1.290956 |

|   |           |           |           |
|---|-----------|-----------|-----------|
| H | -1.246751 | -2.740687 | -1.622983 |
| H | -1.772931 | -2.839453 | 0.829414  |
| P | -1.731976 | 1.608178  | 0.365902  |
| P | 1.057413  | 2.383070  | -0.428667 |
| C | -1.430374 | 3.374975  | -0.019514 |
| C | -0.230427 | 3.679387  | -0.547207 |
| H | -1.701617 | 1.505979  | 1.790589  |
| H | 1.312665  | 1.954598  | -1.767256 |
| H | 0.020658  | 4.687981  | -0.891916 |
| H | -2.241933 | 4.104578  | 0.068179  |

---

Energy E(RB+HF-LYP) -1932.02953479 a.u.  
-5072543.54 kJ/mol  
-1212366.89 kcal/mol

SCF Convergence: 0.3362D-08

Maximum Force: 0.000018

<S\*\*2>: 0.0000

Charge: 0.0000

ZPE-correction: 0.137569 a.u.

Lowest Frequency 34.1441 cm-1

---

**p3-aa**

Atom Coordinates (x,y,z) in Angstrom

---

|    |           |           |           |
|----|-----------|-----------|-----------|
| Ru | -0.786420 | 0.001918  | 0.065462  |
| Cl | -0.775878 | -2.172769 | 1.079859  |
| Cl | -1.084725 | 2.041204  | -1.157348 |
| C  | 1.093381  | 0.093299  | -0.007112 |
| C  | -1.187975 | 0.781930  | 1.667690  |
| H  | -1.431134 | 1.855648  | 1.734755  |
| H  | -1.228548 | 0.189975  | 2.597256  |
| C  | -3.368961 | -0.121577 | 0.168288  |
| C  | -2.864527 | -0.671044 | -0.974723 |
| H  | -3.690268 | 0.922733  | 0.192789  |
| H  | -3.570628 | -0.740693 | 1.045919  |
| H  | -2.679029 | -1.746981 | -1.033639 |
| H  | -2.806724 | -0.079198 | -1.891687 |
| P  | 2.275504  | 0.438010  | 1.308073  |
| C  | 3.775115  | 0.016308  | 0.339043  |
| C  | 3.608732  | -0.143977 | -0.985033 |
| P  | 1.885570  | -0.301366 | -1.604583 |
| H  | 2.032434  | -0.736702 | 2.084330  |
| H  | 4.448511  | -0.293137 | -1.672034 |
| H  | 1.642131  | 0.962080  | -2.228494 |
| H  | 4.765269  | 0.039207  | 0.806513  |

---

Energy E(RB+HF-LYP) -1932.03817581 a.u.  
-5072566.23 kJ/mol  
-1212372.31 kcal/mol

SCF Convergence: 0.2858D-08

Maximum Force: 0.000016

<S\*\*2>: 0.0000

Charge: 0.0000

ZPE-correction: 0.137877 a.u.

Lowest Frequency 32.0773 cm-1

---

**[Ru]SIH-ii**

Atom Coordinates (x,y,z) in Angstrom

---

|   |           |           |           |
|---|-----------|-----------|-----------|
| N | 1.062844  | 0.185483  | -2.148520 |
| C | 0.725999  | 0.061532  | -3.568900 |
| C | -0.508423 | -0.870346 | -3.516336 |
| N | -0.886870 | -0.770026 | -2.108981 |
| C | 0.048926  | -0.194242 | -1.349096 |

|    |           |           |           |
|----|-----------|-----------|-----------|
| H  | -1.706267 | -1.186877 | -1.670584 |
| Ru | 0.017547  | 0.028577  | 0.668415  |
| Cl | 1.286580  | 2.019397  | 0.299602  |
| H  | 1.711052  | 0.882989  | -1.787178 |
| C  | 1.214368  | -1.330217 | 0.812859  |
| Cl | -2.160628 | -0.958195 | 0.616799  |
| C  | -0.507418 | -0.155299 | 3.045648  |
| C  | 0.544071  | 0.702014  | 2.958562  |
| H  | 0.475735  | 1.048077  | -3.999048 |
| H  | 1.555086  | -0.365626 | -4.152137 |
| H  | -0.248605 | -1.911382 | -3.780145 |
| H  | -1.319774 | -0.542936 | -4.183651 |
| H  | 1.570965  | -1.662573 | 1.804586  |
| H  | 1.646142  | -1.884285 | -0.037376 |
| H  | 1.578133  | 0.368522  | 3.073278  |
| H  | -0.374116 | -1.222995 | 3.235549  |
| H  | 0.397773  | 1.783244  | 2.925722  |
| H  | -1.536323 | 0.207197  | 3.088020  |

---

Energy E(RB+HF-LYP) -1360.23703630 a.u.  
-3571302.34 kJ/mol  
-853561.66 kcal/mol

SCF Convergence: 0.2596D-08  
Maximum Force: 0.000002  
<S\*\*2>: 0.0000  
Charge: 0.0000  
ZPE-correction: 0.178500 a.u.  
Lowest Frequency 46.4860 cm-1

**[Ru]SIH-ia**

Atom Coordinates (x,y,z) in Angstrom

|    |           |           |           |
|----|-----------|-----------|-----------|
| C  | -0.639476 | 0.454508  | 3.589630  |
| N  | -1.006497 | 0.325314  | 2.180968  |
| C  | 0.048467  | 0.170902  | 1.373342  |
| N  | 1.156877  | 0.110607  | 2.133486  |
| C  | 0.846326  | 0.018136  | 3.562568  |
| Ru | 0.005839  | 0.036394  | -0.626491 |
| Cl | -2.355987 | 0.315581  | -0.601299 |
| H  | 1.999405  | -0.279403 | 1.716240  |
| H  | -1.927703 | 0.490578  | 1.780212  |
| C  | 0.693054  | 1.726274  | -0.703677 |
| Cl | 1.906994  | -1.383442 | -0.545366 |
| H  | 1.490885  | 0.673459  | 4.166855  |
| H  | 0.974578  | -1.017883 | 3.924042  |
| H  | -1.259278 | -0.185021 | 4.235901  |
| H  | -0.754519 | 1.498696  | 3.931624  |
| H  | 0.885056  | 2.239298  | -1.660366 |
| H  | 0.956295  | 2.321716  | 0.187279  |
| C  | 0.190095  | 0.190852  | -3.145341 |
| C  | -0.405480 | -0.993388 | -2.873885 |
| H  | -0.404731 | 1.082606  | -3.359730 |
| H  | -1.493750 | -1.087923 | -2.858023 |
| H  | 0.185194  | -1.906403 | -2.760826 |
| H  | 1.273982  | 0.267430  | -3.261281 |

---

Energy E(RB+HF-LYP) -1360.23618972 a.u.  
-3571300.12 kJ/mol  
-853561.13 kcal/mol

SCF Convergence: 0.4333D-08  
Maximum Force: 0.000002  
<S\*\*2>: 0.0000  
Charge: 0.0000

ZPE-correction: 0.177947 a.u.  
 Lowest Frequency 36.3534 cm-1

---

**[Ru]SIH-ai**

Atom Coordinates (x,y,z) in Angstrom

```

-----
N    0.807458    0.575892   -2.200881
C    0.403611    0.466119   -3.603356
C   -0.672346   -0.648224   -3.532363
N   -0.940715   -0.707844   -2.094856
C   -0.030474   -0.051973   -1.376782
H   -1.567259   -1.358190   -1.612980
Ru   0.009621    0.032544    0.724655
Cl   1.614546    1.857903    0.382365
H    1.455170    1.261035   -1.803673
C    1.350667   -1.167102    0.891023
Cl  -1.661370   -1.762231    0.611985
C   -0.947563    0.102221    2.799256
C   -0.013187    1.113516    2.740922
H   -0.015011    1.422258   -3.964771
H    1.250564    0.198854   -4.252668
H   -0.287267   -1.617298   -3.896387
H   -1.578325   -0.404686   -4.106949
H    1.139309   -2.243664    1.012163
H    2.408012   -0.850879    0.876287
H   -0.299969    2.140054    2.497730
H   -0.728729   -0.861986    3.262155
H    0.990794    0.997561    3.153765
H   -2.006042    0.294921    2.604515
-----

```

```

Energy E(RB+HF-LYP)  -1360.22928723 a.u.
                    -3571281.99 kJ/mol
                    -853556.80 kcal/mol

```

SCF Convergence: 0.3587D-08

Maximum Force: 0.000006

<S\*\*2>: 0.0000

Charge: 0.0000

ZPE-correction: 0.178278 a.u.

Lowest Frequency 51.1371 cm-1

---
